## Evidence for boundary layer oxygen diffusion limitation as a key driver of asteroid wasting

Citlalli A. Aquino<sup>1\*</sup>, Ryan M. Besemer<sup>2\*</sup>, Christopher M. DeRito<sup>3</sup>, Jan Kocian<sup>4</sup>, Ian R. Porter<sup>5</sup>, Peter Raimondi<sup>6</sup>, Jordan E. Rede<sup>3</sup>, Lauren M. Schiebelhut<sup>7</sup>, Jed P. Sparks<sup>8</sup>, John P. Wares<sup>9</sup>, Ian Hewson<sup>3†</sup>

<sup>1</sup>Department of Biology, Estuary and Ocean Science Center, San Francisco State University, Romberg Tiburon Campus, 3150 Paradise Dr, Tiburon CA 94132 USA

<sup>2</sup>Center for Marine Science, University of North Carolina Wilmington, 5600 Marvin K Moss Ln, Wilmington, NC 28409 USA

<sup>3</sup>Department of Microbiology, Cornell University, Wing Hall 403, Ithaca NY 14853 USA

<sup>4</sup>Independent Scientist, Leland WA 98376 USA

<sup>5</sup>Department of Clinical Sciences, College of Veterinary Medicine, Cornell University, 602 Tower Rd, Ithaca, NY 14853 USA

<sup>6</sup>Institute of Marine Sciences, Department of Ecology & Evolutionary Biology, University of California Santa Cruz, 1156 High Street, Santa Cruz, CA 95064 USA

<sup>7</sup>Life and Environmental Sciences, University of California Merced, 5200 North Lake Rd. Merced, CA 95343 USA

<sup>8</sup>Department of Ecology & Evolutionary Biology, Cornell University, Corson Hall, Ithaca NY 14853 USA

<sup>9</sup>Department of Genetics, University of Georgia, 30602 120 W Green St, Athens, GA 30602 USA

\*Denotes equal author contribution

†Corresponding Author: Department of Microbiology, Wing Hall 403, Cornell University, Ithaca NY 14853 USA, Email: [hewson@cornell.edu](mailto:hewson@cornell.edu), Tel: +16072550151

Running Head: **Boundary Layer Microorganisms Affect Asteroid Wasting**

Author Contributions: LMS and IH designed research; CA, RMB, CMD, JK, IRP, PR, JER, LMS, JPS and IH performed research; CA, RMB, CMD, IRP, PR, JER, LMS, JPS, JPW and IH conducted review and wrote the manuscript; PR and IH provided funding for the research.

Keywords: Sea Star Wasting, Oxygen, Heterotroph, Remineralization, Phytoplankton

## 1 **ABSTRACT**

2 Sea star wasting (SSW) disease describes a condition affecting asteroids that resulted in  
3 significant Northeastern Pacific population decline following a mass mortality event in 2013.  
4 The etiology of sea star wasting is unresolved. We hypothesize that asteroid wasting is a sequela  
5 of microbial organic matter remineralization near respiratory surfaces which leads to boundary  
6 layer oxygen diffusion limitation (BLODL). Wasting lesions were induced in *Pisaster ochraceus*  
7 by enrichment with a variety of organic matter (OM) sources. Microbial assemblages inhabiting  
8 tissues and at the asteroid-water interface bore signatures of copiotroph proliferation before  
9 wasting onset, concomitant with and followed by the proliferation of putatively facultative and  
10 strictly anaerobic taxa. Bacterial cell abundance increased dramatically prior to wasting onset in  
11 experimental incubations. Wasting susceptibility was significantly correlated with rugosity (a  
12 key determinant of boundary layer thickness) of animal surfaces. At a semi-continuously  
13 monitored field site (Langley Harbor), wasting predictably occurred at annual peak or decline in  
14 phytoplankton biomass. Finally, wasting individuals from 2013 – 2014 bore stable isotopic  
15 signatures reflecting anaerobic processes and altered C and N metabolisms. These convergent  
16 lines of evidence support our hypothesis that BLODL is associated with wasting both in  
17 contemporary SSW events and during the 2013-2014 SSW mass mortality event, potentially  
18 driven by phytoplankton-derived OM. The impacts of BLODL may be more pronounced under  
19 higher temperatures due to lower O<sub>2</sub> solubility, in more rugose asteroid species due to restricted  
20 hydrodynamic flow, and in larger specimens due to their lower surface area to volume ratios  
21 which affects diffusive respiratory potential.

22

23 **Significance Statement:** Sea star wasting disease affected multiple species of asteroids and has  
24 caused mass mortality in the Northeast Pacific Ocean since 2013. The underlying cause of  
25 wasting is unknown. We hypothesized that wasting may be due to respiratory deficit resulting  
26 from heterotrophic bacterial consumption of organic matter, resulting in oxygen depletion, near  
27 animal surfaces. Here, we provide convergent lines of evidence for this hypothesis, including  
28 shifts in microbial assemblage abundance and composition during wasting which suggest surface  
29 tissues experience sub-oxic conditions. Organic matter amendment results in asteroid wasting,  
30 and we provide elemental evidence for anaerobic conditions during mass mortality in 2013-2014.

31 Our results are entirely consistent with environmental correlates of wasting in prior studies,  
32 including thermal stress and upwelling.

33

## 34 **INTRODUCTION**

35 Sea star wasting (SSW) disease describes a suite of clinical signs in asteroids including loss of  
36 turgor, arm twisting, epidermal ulceration, limb autotomy, and death. The condition gained  
37 prominence in 2013 when it caused mass mortality of >20 asteroid species in the Northeastern  
38 Pacific (Hewson et al. 2014) with continuous observations since (Jaffe et al. 2019; Miner et al.  
39 2018). However, lesions compatible with SSW in various asteroid species have been reported  
40 since at least 1896 in the Eastern US (Mead 1898), and at many locations globally (reviewed in  
41 Hewson et al. 2019). The cause of SSW is unresolved. Early reports that SSW was associated  
42 with a densovirus (Hewson et al. 2014) were refuted by subsequent investigation that failed to  
43 show a consistent association between the virus and presence of disease (Hewson et al. 2018),  
44 and recent description of persistent infection by a related densovirus in three species of grossly  
45 normal sea stars (Jackson et al. 2020) suggest this virus to be a component of normal  
46 microbiome. Furthermore, wasting is not consistently associated with any bacterial or microbial  
47 eukaryotic organism (Hewson et al. 2018). Environmental conditions, including elevated water  
48 temperatures (Eisenlord et al. 2016; Kohl et al. 2016), lower water temperatures and higher pCO<sub>2</sub>  
49 (Menge et al. 2016), and meteorological conditions (Hewson et al. 2018a) correspond with  
50 wasting at distinct locations. Recent modelling studies suggest repeated sea surface temperature  
51 anomalies may correlate with wasting (Aalto et al. 2020). Reports of SSW spread between  
52 adjacent geographic locations, through public aquarium intakes, and challenge experiments with  
53 tissue homogenates suggested a transmissible etiology (Bucci et al. 2017; Hewson et al. 2014).  
54 However, there is a lack of mechanistic understanding how SSW is generated in affected  
55 individuals.

56 Here we provide convergent evidence that asteroid wasting is a consequence of boundary layer  
57 oxygen diffusion limitation (BLODL). First, microbiome changes during wasting progression  
58 suggest that heterotrophic (copiotrophic) microorganisms proliferate before wasting, followed by  
59 growth of taxa with facultative or strictly anaerobic metabolism, indicating depletion of  
60 dissolved O<sub>2</sub> near animal surfaces and within tissues. We demonstrate that wasting can result

61 from suboxic water column conditions, and that wasting lesions are induced by amendment with  
62 organic matter. Next, we illustrate that wasting susceptibility is related to between-species  
63 variation in rugosity (and subsequent impacts on boundary layer height), which ultimately relates  
64 to gas flux potential. Finally, we demonstrate that wasting asteroids from the 2013-2014 mass  
65 mortality event bore stable isotopic signatures that reflect anaerobic microbial processes and  
66 altered C and N metabolisms compared to their asymptomatic sympatric counterparts.

67

## 68 **MATERIALS AND METHODS:**

69 For detailed experimental protocols and statistical analyses performed please refer to the  
70 *Supplemental Information*. Study of microbiome shifts during wasting progression in the absence  
71 of external stimuli directed an experiment to examine the impact of suboxic conditions on SSW  
72 genesis. Hypotheses generated from these observations directed study of organic matter (OM)  
73 impacts on SSW. Following this, we examined asteroid rugosity as it relates to SSW  
74 susceptibility, and sought evidence linking biological oceanographic conditions to wasting  
75 through time series analysis at a field site. Finally, we examined stable isotopic signatures of  
76 anaerobic processes in samples collected from 2013-2014 to examine evidence for anaerobic  
77 conditions during mass mortality.

78 ***Wasting progression in the absence of external stimuli:*** We examined longitudinal changes in  
79 *Pisaster ochraceus* microbiome composition during wasting progression in two studies to  
80 understand potentially pathogenic taxa. In both experiments, *P. ochraceus* were collected from  
81 sites near Santa Cruz, CA, in Summer 2018, and experiments performed at the Long Marine  
82 Laboratory at UC Santa Cruz in flow-through sea tables. In the first experiment, we focused on  
83 microbial community changes in lesion margin tissues, while in the second experiment, we also  
84 examined microbial community changes in artificial scar abrasions to parse microbial taxa  
85 unique to SSW-affected tissues. In addition to animal mass and gross appearance, temperature,  
86 salinity and dissolved oxygen (DO) were measured using both HOBO loggers (Onset) or a  
87 handheld probe (YSI-3000).

88 ***Impact of suboxic conditions on wasting in *Asterias forbesi*:*** We examined the impacts of  
89 reduced oxygen conditions on *Asterias forbesi* wasting in the context of microbiome

90 composition. Asteroid specimens (n = 24 specimens) were transported to the Department of  
91 Microbiology at Cornell University. There, asteroids were divided into two recirculating  
92 aquarium systems. One system was continuously sparged with N<sub>2</sub>, resulting in a ~39% decrease  
93 in DO, while the second maintained saturated DO conditions throughout the experiment.  
94 Specimens were monitored daily for SSW lesions. Samples for microbial community analyses  
95 were collected by body wall biopsy punch (i.e. surface and tissue bound microorganisms) and by  
96 surface swab (i.e. surface bound microorganisms).

97 ***Impact of OM enrichment on sea star wasting:*** We examined the impact of variable-source OM  
98 enrichment on asteroid wasting to test whether enrichment caused bacterial abundance and  
99 microbial composition shifts consistent with the boundary layer oxygen diffusion limitation  
100 (BLODL) hypothesis. *Pisaster ochraceus* (n = 20 specimens) were obtained from the jetty at  
101 Bodega Bay in Summer 2019, and experiments were performed in flow-through large volume  
102 sea tables at the Bodega Bay Marine Laboratory. Asteroids were subject to daily doses of 4  
103 organic matter sources: particulate OM (POM; > 10 µm) of a dense *Dunaliella tertiolecta* culture;  
104 POM (>10 µm) concentrated from aquarium inflow water; and Peptone. Bacterial abundance in  
105 aquarium water and in samples retrieved from specimen surfaces was examined by SYBR Gold  
106 epifluorescence microscopy (Noble and Fuhrman 1998; Porter and Feig 1980; Shibata et al.  
107 2006). Samples of lesion margin tissue, body wall and surface swabs were collected consistently  
108 with suboxic experiments detailed earlier.

109 ***Additional experimental challenges of Pisaster ochraceus:*** Additional experiments to  
110 determine the impacts of desiccation, aquarium water replenishment rate (i.e. flow rate), and  
111 challenge with wasted asteroid tissue homogenates were performed in Summer 2018 at the Long  
112 Marine Laboratory at UC Santa Cruz. Experiments were performed in flow-through sea tables  
113 receiving influent coastal water. State parameters (temperature, salinity and DO) were  
114 continuously measured by HOBO Spot (Onset) loggers.

115 ***Microbial assemblage analyses:*** Microbial assemblages inhabiting body wall samples (i.e.  
116 biopsy punch; wasting in the absence of external stimuli), lesion margins (i.e. epidermal scrapes;  
117 wasting in the absence of external stimuli), and at the animal/water interface (i.e. swabs; suboxic  
118 and OM enrichment experiments) were examined by 16S rRNA amplicon sequencing (Caporaso  
119 et al. 2011). Viral assemblages were examined from the August 2018 study of wasting

120 progression in the absence of external stimuli by viral metagenomics (Thurber et al. 2009)  
121 targeting RNA viruses.

122 ***Bacterial cultivation and growth rates:*** We sought to determine the growth characteristics of  
123 asteroid-associated bacteria on organic matter substrates. We isolated three cultures of bacteria,  
124 representing common orders retrieved during microbial assemblage analyses, on media  
125 containing filtered asteroid tissue homogenates as nutritional source, and examined their growth  
126 dynamics on dissolved OM (DOM) from a *Dunaliella tertiolecta* culture, filtered ( $< 0.7 \mu\text{m}$ )  
127 asteroid tissue homogenates, peptone and glucose at ambient and elevated temperatures.

128 ***Association of wasting susceptibility with rugosity and surface area to volume ratio:*** The  
129 relative rugosity between wasting-affected and less wasting-affected asteroid species was  
130 examined by imaging approaches. Whole specimens of 11 asteroid species were collected at 3  
131 locations, preserved in 10% neutral buffered formalin, and transported to the College of  
132 Veterinary Medicine at Cornell University where they were subject to large animal computed  
133 tomography. This analysis provided the total surface area and volume of specimens to a  
134 resolution of  $400 \mu\text{m}$ . We also performed micro-computed tomography of ray sections on a  
135 subset of these specimens, which provided resolution to  $20 \mu\text{m}$ . The rugosity, surface area,  
136 surface area:volume and calculated potential diffusion rates were compared with wasting  
137 susceptibility and speed during aquarium studies.

138 ***Asteroid specimen respiration:*** The respiration rates of individual asteroids was measured upon  
139 experiment initiation for *Asterias forbesi* and *Pisaster ochraceus* (as described above), and for  
140 additional field-collected asteroid species at the Bodega Marine Laboratory. DO depletion was  
141 measured in water-tight chambers from which bubbles were eliminated, and recirculated using  
142 submersible DC motors. DO depletion rate for each specimen was standardized by specimen  
143 mass.

144 ***Time series analyses of wasting intensity and chlorophyll a at Whidbey Island:*** To understand  
145 the relationship between ambient primary producer biomass (chlorophyll a), physico-chemical  
146 parameters (temperature, salinity, DO), and occurrence of wasting, we examined data obtained  
147 from the Penn Cove Shellfish data buoy and compared this to observations of wasting frequency  
148 at Coupeville Wharf and Langley Harbor as reported previously (Hewson et al. 2018) from  
149 August 2014 to June 2019. We compared the mean time of wasting occurrence over the 5 year



150 period with mean oceanographic parameters for the period, and also compared the 3 month  
151 window before wasting onset with non-wasting months.

152 ***Stable isotopic signatures in historical wasting asteroid specimens:*** The natural abundance of  
153  $^{15}\text{N}$  and  $^{13}\text{C}$  was determined in 71 individual starfish specimens, including 50 individuals  
154 representing paired asymptomatic/wasting affected species at distinct sites and sampling times  
155 which were collected as part of prior work during wasting mass mortality (2013-2014).

156

## 157 **RESULTS AND DISCUSSION**

### 158 **Shifts in heterotrophic bacterial and archaeal communities during wasting progression** 159 **reflect oxygen depletion in boundary layers**

160 We observed changes in microbial communities during wasting in the absence of external stimuli  
161 and in perturbation experiments that reflect progressive depletion of oxygen at and near the  
162 animal/water interface. Time-course analyses of microbiome variation during wasting  
163 progression were examined by 16S rRNA amplicon sequencing (Caporaso et al. 2011)  
164 (*Supplemental Information; SI*). The relative abundance of taxa within asteroid-associated  
165 microbiomes varied with sample type. Body wall (i.e. using a biopsy punch) and epidermis of  
166 lesion margin (i.e. scrape on margin) assemblages were dominated by orders Spirochaetales and  
167 Cytophagales, while assemblages immediately above and on surfaces (collected by swabs), bore  
168 a large proportion of orders associated with organic rich environments, e.g., Alteromonadales,  
169 Flavobacteriales, Rhizobiales, and Rhodobacterales (see *Supplemental Information; SI*). We  
170 observed a progressive increase in copiotrophic orders preceding wasting, including  
171 Campylobacterales, Flavobacteriales and Vibrionales (Fig. 1A). This occurred concomitant with  
172 an increase in *Nitrosopumilus* and obligate anaerobes (Deltaproteobacteria) relative to a large  
173 clade of typically fast-growing phyla (Alpha- and Gammaproteobacteria) immediately prior to  
174 lesion genesis (Fig. 1B-D). Following lesion genesis, we observed a further increase in  
175 copiotrophs in body wall and epidermal samples, and a proliferation in microaerophiles  
176 (*Arcobacter* spp.), facultative anaerobes (*Moritella* spp.) and obligate anaerobic families  
177 (Clostridia, Fusobacteria and Bacteroidia) at time of death (Fig. 1A). Collectively, these

178 observations reflect an increasingly anaerobic environment at the epidermal boundary layer  
179 which is established prior to wasting onset.

180 Several studies have observed the proliferation of copiotrophic taxa longitudinally during  
181 wasting, including genera within the families Flavobacteriaceae, Rhodobacteriaceae (Lloyd and  
182 Pespeni 2018), Actinobacteria, and genera in the orders Alteromonadales (Nuñez-Pons et al.  
183 2018), Vibrionales and Oceanospirales (Høj et al. 2018). These taxonomic groups are amongst  
184 the most active constituents of bacterioplankton and major players in marine organic matter  
185 (OM) degradation, some of which have facultative anaerobic metabolisms (Buchan et al. 2014;  
186 Choi et al. 2010; Pinhassi et al. 2004; Pohlner et al. 2019; Thiele et al. 2017). While it is  
187 tempting to ascribe pathogenicity traits to groups that are enriched on disease-affected tissues  
188 (based on members of the same family or genus causing pathology), or infer their role in  
189 community dysbiosis (i.e. the microbial boundary effect), this is not possible in the absence of  
190 demonstrated pathogenicity or strain-level assignment (Hewson 2019). Previous study  
191 comparing wasting and asymptomatic asteroid-associated community gene transcription noted  
192 the increase in transcripts from *Propionibacterium*, *Lachnospiraceae* and *Methanosarcina*,  
193 which are strict anaerobes, as well as *Stigmatella* and *Staphylococcus*, which are facultative  
194 anaerobes, as a proportion of total transcripts (Gudenkauf and Hewson 2015).

195 Taken together, these data suggest that the proliferation of copiotrophic taxa near wasting  
196 asteroid surfaces may lead to suboxic conditions at the animal-water interface. All aquatic  
197 surfaces are coated with a thin film of water (i.e. diffusive boundary layer) that impedes gas and  
198 solute exchange, and, provided aerobic respiration is sufficiently high, suboxic conditions can  
199 form on a surface despite oxygen saturated water circulating above (Jørgensen and Revsbech  
200 1985). This may result in the proliferation of facultative and obligate anaerobes until asteroid  
201 death, and also explains why we observed both an increase in both strict aerobes and strict  
202 anaerobes concomitantly. Stimulation of bacteria and subsequent O<sub>2</sub> diffusion limitation is well  
203 described in mammalian respiratory systems as well, and is especially pronounced in cystic  
204 fibrosis patients. Heterotrophic bacteria inhabiting mammalian lungs thrive on mucins and  
205 generate biofilms which further restrict O<sub>2</sub> diffusion into tissues. O<sub>2</sub> consumption by biofilms  
206 and by neutrophils may result in hypoxia and reduced diffusion of O<sub>2</sub> across alveolar tissues (Wu  
207 et al. 2018). This in turn leads to the proliferation of anaerobes, which are present in clinically



208 normal lungs (reviewed in (Guilloux et al. 2018) and elevated in diseased lungs (Denner et al.  
209 2016; Spence et al. 2020; Wang et al. 2019). This phenomenon is also observed in fish gills  
210 (Legrand et al. 2018; Meyer et al. 2019) which are inhabited by copiotrophic and potentially  
211 facultatively anaerobic taxa (Reverter et al. 2017; Rosado et al. 2019).

212 We found no consistent association between any virus and wasting between specimens, despite  
213 increased richness of viruses late in the wasting progression, possibly due to generalized  
214 hypoxia-induced replication (*SI*). Moreover, our observations support earlier observation that  
215 the Sea Star associated Densovirus (SSaDV; ICTV: Asteroid ambidensovirus 1) is not associated  
216 with wasting in any asteroid (Hewson et al. 2018a).

### 217 **Asteroid wasting is induced by suboxic conditions**

218 Our data demonstrate that SSW is induced by suboxic water column conditions. We incubated *A.*  
219 *forbesi* in suboxic water and observed patterns of wasting progression, boundary layer bacterial  
220 abundance and microbial assemblage  $\beta$ -diversity. Dissolved oxygen (DO) concentrations were  
221 controlled in an aquarium setting by continuous sparging with N<sub>2</sub>, which were on average 39%  
222 lower than untreated control incubations (*SI*). All individuals remained asymptomatic in control  
223 incubations over the 13 day experiment, while 75% of individuals in hypoxic conditions  
224 developed lesions (mean time to lesion genesis =  $9.58 \pm 0.89$  d). Development of lesions over  
225 time was strongly related to treatment ( $p = 0.006$ , log-rank test,  $df=12$ ). Bacterial abundance on  
226 animal surfaces (which we define as abundance in surface samples) corrected for aquarium water  
227 values increased in both control and suboxic treatments over the first 6d of incubation, but by  
228 day 13, abundance of bacteria in suboxic treatments was significantly lower ( $p < 0.001$ , Student's  
229 t-test,  $df=12$ ) on suboxic treated individuals than in control individuals (Fig. 2). *Asterias forbesi*  
230 treated with suboxic waters demonstrated consistent shifts in microbial communities with  
231 treatment (*SI*). However, no single bacterial taxonomic organization strongly differentiated  
232 normoxic from suboxic conditions.

233 Wasting induction in *Asterias forbesi* by suboxic conditions is also consistent with our  
234 observation that wasting in *Pisaster ochraceus* was inversely correlated to mean flow rate in  
235 aquarium studies (i.e. longer residence time of water; *SI*). While we did not measure DO  
236 concentrations in flow-rate experiments, lower flow rates into aquaria likely led to faster O<sub>2</sub>  
237 depletion and the accumulation of toxic exudates (notably NH<sub>3</sub> [Propp et al. 1983] and S<sup>-</sup>

238 [Vistisen and Vismann 1997]), and establishment of more extensive boundary layer conditions than  
239 those individuals incubated in faster flow rates (Fonseca and Kenworthy 1987). The mechanism  
240 by which asteroids are particularly sensitive to ambient O<sub>2</sub> concentrations is not well constrained  
241 by empirical studies, especially as it relates to SSW. Asteroids mostly rely on passive respiration  
242 (c.f. ventilation) and gas diffusion across outer membranes to meet respiratory demand, a point  
243 illustrated by mass mortality events of benthic invertebrates, including asteroids, correlated to  
244 low O<sub>2</sub> conditions (reviewed in Diaz and Rosenberg 1995; Levin 2003; Levin et al. 2009).  
245 Together, these data point to significant influence of O<sub>2</sub> conditions on asteroid wasting. While  
246 water column hypoxia events were not observed in concert with SSW in 2013 and beyond,  
247 spatially localized hypoxia may occur near surfaces experiencing limited hydrodynamic flow  
248 (Gregg et al. 2013).

#### 249 **Organic matter amendment stimulates boundary layer microorganisms and causes rapid** 250 **wasting**

251 We sought to examine the impact of elevated heterotrophic bacterial respiration on animal  
252 surfaces through challenge with various sources of organic matter (OM) which we hypothesized  
253 would fuel microbial remineralization. We performed laboratory experiments in which *P.*  
254 *ochraceus* was amended with peptone, *Dunaliella tertiolecta*-derived particulate OM (POM),  
255 and coastal seawater POM and examined their impacts on SSW progression and boundary layer  
256 bacterial abundance and composition. The addition of organic substrates (peptone and *Dunaliella*  
257 *tertiolecta*-derived POM) induced significantly faster lesion genesis than control incubations  
258 ( $p=0.012$  for peptone and  $p=0.04$  for *Dunaliella*-POM, Student's t-test,  $df=5$ ), but lesion genesis  
259 time was not significantly different for the addition of coastal-POM (Fig. 3). Collective treatment  
260 temporal pattern of lesion genesis was only significantly different from controls with amendment  
261 with peptone ( $p = 0.0154$ , log-rank test,  $df=5$ ) and *Dunaliella*-POM ( $p=0.0339$ , log-rank test,  
262  $df=5$ ). Variation in dissolved O<sub>2</sub> in incubations varied over the course of the experiment from 9.6  
263 – 10.2 mg L<sup>-1</sup> and were never under-saturated. Temperature varied from 12 – 14°C, but variation  
264 did not correspond with wasting in any treatment.

265 Bacterial abundance on asteroid surfaces was variable after enrichment with organic substrates.  
266 Individuals that did not waste over the course of the experiment maintained abundances of 0.7 –  
267 2.6 x 10<sup>6</sup> cells mL<sup>-1</sup>, which was enriched 53 to 1743% above bacterioplankton abundances in

268 incubation treatments (Fig. 4). All three OM additions elevated bacterial abundances relative to  
269 their initial values in the first 48h of the incubation. Between 48 and 96 h, dynamics of surface-  
270 inhabiting bacteria varied between treatments. Both *Dunaliella*-POM and peptone, despite initial  
271 surges in bacterial abundance, strongly decreased before 96 h, while coastal DOM remained  
272 higher than initial values throughout the experiments. The decrease in bacterial abundance after  
273 initial increase may be evidence of heterotrophic remineralization-fueled O<sub>2</sub> deficit over time on  
274 wasting asteroids, similar to the effect observed in our experiments with *Asterias forbesi*  
275 incubated in hypoxic water (Fig. 2). Facultative and strict anaerobes generally experience slow  
276 growth rates compared to aerobic taxa because it is less energetically efficient to grow on  
277 reduced electron acceptors. While standing stock of aquatic bacteria may be higher in anaerobic  
278 conditions than in aerobic conditions, population growth rates are typically lower (Cole and Pace  
279 1995).

280 The boundary layer microbiota of *P. ochraceus* changed over time in all treatments (Figs. 1B-G;  
281 *SI*), but the most prominent changes were distinguished by the copiotrophic orders  
282 Flavobacteriales and Rhodobacterales, which increased uniformly in both organic matter  
283 amended and untreated individuals, indicating that captivity alone induced changes in  
284 microbiome composition (Fig. 5). Since bacterial abundance increased dramatically in the first  
285 phase of enrichment, we posit that wasting is induced by copiotroph proliferation on animal  
286 surfaces. Heterotrophic bacteria in marine environments remineralize OM that originates from  
287 autochthonous and allochthonous sources (Amon and Benner 1996; Benner et al. 1992; Ducklow  
288 1983). Among the myriad of OM sources in seawater, phytoplankton-derived OM are highly  
289 labile (Ochiai et al. 1980; Ogawa and Tanoue 2003; Thornton 2014). On regional scales, excess  
290 phytoplankton-fueled bacterial respiration, caused by eutrophication and enrichment from  
291 terrestrial sources and upwelling zones may result in ‘dead zones’ (e.g. Mississippi River Plume,  
292 Peruvian upwelling zone, Benguela current; reviewed in Diaz and Rosenberg 2008) and may be  
293 exacerbated by seasonal temperature changes (Murphy et al. 2011) and restricted bathymetry  
294 (Diaz 2001). However, water column hypoxia has never been observed at sites where asteroids  
295 experienced SSW mass mortality. Indeed, many wasting asteroids occurred in well-circulated  
296 and intertidal environments (Hewson et al. 2014). We posit that OM amendment stimulates  
297 bacterial abundance immediately adjacent to asteroid respiratory surfaces (i.e. within boundary

298 layers) leading to suboxic microzones and ultimately limiting gas diffusion potential (Gregg et  
299 al. 2013).

300 Rapid mineralization of dissolved OM by bacteria near asteroids has been noted previously in  
301 studies of epidermal amino acid uptake by *Asterias rubrens*, which ultimately led to decreased  
302 animal weight (Siebers 1979), and may be responsible for very low ambient DOM  
303 concentrations adjacent to asteroids (Siebers 2015). To illustrate the potential for asteroid surface  
304 bacteria to rapidly grow on OM, we isolated 3 cultures on solid media containing tissue  
305 homogenates as the sole nutritional source, and examined growth characteristics at two  
306 temperatures against variable C sources (algal-derived dissolved (i.e. 0.7  $\mu\text{m}$ -filtered) OM,  
307 purified asteroid tissue homogenate, peptone and glucose; *SI*). The three cultures included taxa  
308 that belonged to orders that were well-represented in amplicon libraries, including a  
309 *Rhodobacteria* (Alphaproteobacteria), and two Altermonadales. Bacteria grew faster, with  
310 shorter lag times on peptone in all comparisons and on glucose in most comparisons. While there  
311 was considerable lag time in the growth of two cultures (SS1 and SS12) on *Dunaliella tertiolecta*  
312 and asteroid tissue DOM, which may be due to lower lability of these substrates, the lag time and  
313 growth rates of SS6 (most similar to *Glaciecola* sp.; Altermonadales) was much lower than  
314 controls, suggesting rapid assimilation of compounds from these sources. *Glaciecola mesophila*  
315 was initially isolated from a marine invertebrate (ascidian) and degrades complex carbohydrates  
316 produced by algae (Romanenko et al. 2003). These results demonstrate that bacteria inhabiting  
317 asteroid surfaces are capable of rapid uptake and regeneration of various organic compounds,  
318 including those we hypothesize may lead to hypoxia on animal surfaces. Our observation that  
319 lesion genesis time was best explained by initial bacterial abundance in suboxia-experiments and  
320 by overall change in bacterial abundance in the first 3 days of incubation in *Pisaster ochraceus*  
321 further indicates a key role of heterotrophic bacteria in wasting.

322 Bacterial stimulation and enhanced wasting in asteroids is paralleled by the DDAM (dissolved  
323 organic carbon, disease, algae, microorganism) positive feedback loop in tropical corals (Barott  
324 and Rohwer 2012; Dinsdale et al. 2008). Coral disease is associated with OM enrichment (David  
325 et al. 2006; Smith et al. 2006), some of which originates from sympatric primary producers  
326 (Haas et al. 2010; Haas et al. 2011), which in turn are more labile than OM released from the  
327 corals themselves (Haas et al. 2016; Nakajima et al. 2018) and results in both elevated bacterial

328 abundance on coral surfaces (Dinsdale and Rohwer 2011; Haas et al. 2016), and enhanced  
329 remineralization rates (Haas et al. 2016). Bacteria at the coral-water interface have higher  
330 energetic demands than those in plankton (Roach et al. 2017), and are highly adapted to organic  
331 carbon availability in their local environment (Kelly et al. 2014). The spatial scale on which  
332 bacteria react to OM is primarily at water-surface interfaces (Brocke et al. 2015). Hypotheses for  
333 the mechanism of coral mortality caused by heterotrophic bacteria include disruption in the  
334 balance between corals and their associated microbiota (David et al. 2006), introduction of  
335 pathogens that have reservoirs on macroalgae (Nugues et al. 2004), or dysbiosis resulting in  
336 invasion by opportunistic pathogens (Barott and Rohwer 2012). In black band disease (BBD),  
337 DOC released from primary production causes micro-zones of hypoxia which result in  
338 production of toxic sulfides, which in turn result in opening of niches for cyanobacteria (Sato et  
339 al. 2017). In asteroid wasting, the proliferation of heterotrophic bacteria and wasting disease may  
340 be due to any of these effects. It is also interesting to note that some viral genotypes (e.g.  
341 Herpesvirus-like sequences) may be present in higher copy number in diseased coral tissues  
342 (Thurber et al. 2008), which is similar to our observation of viruses in asteroids during wasting  
343 progression (*SI*).

344 Culture work and experimental challenge with asteroid tissue homogenates in this study (*SI*), and  
345 reported previously (Bucci et al. 2017; Hewson et al. 2014), suggest that wasting may also be  
346 associated with decomposition of nearby asteroid individuals via assimilation of tissue-derived  
347 compounds and subsequent BLODL. We previously isolated heterotrophic bacteria using sea star  
348 tissue homogenates as nutritional source (Hewson et al. 2018a). These bacteria include well-  
349 known copiotrophic genera, including those also isolated on sea star tissue homogenate-bearing  
350 media in this study (*SI*). Enrichment of near-benthic OM pools by wasting-affected individuals  
351 may have resulted in the apparent density dependence of wasting observed in 2014 in some  
352 populations (Hewson et al. 2014). Indeed, challenge with tissue homogenates by direct injection  
353 into coelomic cavities likely enriches within-and near animal organic matter pools, which in turn  
354 may stimulate heterotrophic remineralization. Hence, challenge experiments, such as those  
355 performed previously (Bucci et al. 2017; Hewson et al. 2014) and in this study, may be a  
356 consequence of BLODL induced by organic matter availability (and possibly protein-bearing  
357 material). The apparent transmissibility of SSW in field sites is based on observations of density  
358 dependence at some sites, along with geographic spread between adjacent sites and through

359 public aquaria intake pipes (Hewson et al. 2014). These observations may be inaccurately  
360 ascribed to transmissible pathogenic microorganisms, since they may also be explained by  
361 enrichment of surrounding habitats and through intake pipes of organic matter pools from  
362 decaying individuals.

### 363 **Wasting is related to species rugosity, individual size, and respiratory demand**

364 Inter- and intra-species susceptibility to asteroid wasting is extensively recorded in previous  
365 study, including a significant and positive relationship between individual size and wasting  
366 (Hewson et al. 2014), and shifts in size structure after wasting from larger to smaller individuals  
367 of *Pisaster ochraceus*, which was believed to be due to recruitment of juveniles (Bates et al.  
368 2009; Eisenlord et al. 2016; Kay et al. 2019; Menge et al. 2016). Wasting in 2013-2014 affected  
369 > 20 species of asteroid (Hewson et al. 2014), however the magnitude of SSW impact varied  
370 between species. Comparison of community structure before and after wasting suggests inter-  
371 species variability in wasting mortality. Asteroiid taxa (*Pycnopodia helianthoides*, *Pisaster* spp.,  
372 and *Evasterias troschelii*) experienced considerable declines in the Salish Sea (Montecino-  
373 Latorre et al. 2016; Schultz et al. 2016) and Southeast Alaska (Konar et al. 2019), while  
374 *Dermasterias imbricata* maintained or increased in abundance after mass mortality (Eckert et al.  
375 1999; Konar et al. 2019; Montecino-Latorre et al. 2016; Schultz et al. 2016). In the Channel  
376 Islands, SSW disproportionately affected Asteroiid taxa relative to *D. imbricata* and *Patiria*  
377 *miniata* (Eckert et al. 1999). Inter-species differences in wasting intensity have been noted in  
378 citizen science data accumulated by MARINE (Miner et al. 2018). The potential causes of inter-  
379 and within-species wasting susceptibility remain poorly constrained.

380 We hypothesized that wasting susceptibility may relate to both inter-species variation in rugosity  
381 (i.e. degree of corrugation), which dictates diffusive boundary layer thickness, and intra-species  
382 surface area-to-volume ratio, which determines total gas flux potential, which are ultimately  
383 reflected in patterns of population change since 2013 (Eckert et al. 1999; Montecino-Latorre et  
384 al. 2016). Mean and turbulent flow structure around aquatic animals and plants relates to the  
385 mean height, density and shape of structures as they compare to flat surfaces (Brodersen et al.  
386 2015; Koch 1994; Nepf 2011). Asteroid surfaces bear numerous spines and processes, including  
387 papulae, spines, paxillae and pedicellaria. These structures impart rugosity and thus generate  
388 diffusive boundary layers proportional to their relative height under both mean and turbulent



389 flow. For example, the boundary layer height above the urchin *Evechinus chloroticus*. can be 4-5  
390 mm under low ( $1.5 \text{ cm s}^{-1}$ ) flow conditions, which was approximately 2 – 6 X greater than  
391 sympatric macroalgae (Hurd et al. 2011). We also speculate that more extensive boundary layers  
392 may result in greater entrapment of settled OM from overlying waters. Direct measurement of  
393 oxygen concentration in boundary layers as they relate to bacterial remineralization are  
394 precluded by the sensitivity of instruments (e.g. microelectrodes) to physical damage in non-  
395 immobilized specimens.

396 To explore the relationship between species rugosity and wasting susceptibility, we examined  
397 specimens of similar size ( $n = 26$  individual specimens) representing wasting-affected ( $n=3$ ) and  
398 less/not affected species ( $n = 5$ ) using whole-animal computed tomography (*SI*). The mean  
399 rugosity (defined as 3D:2D surface area) was significantly ( $p = 0.015$ , Student's t-test,  $df = 14$ )  
400 lower in less affected species than more affected species (Fig. 6). Surface area:volume,  
401 individual specimen mass, and overall surface area were not significantly different between  
402 categories among similarly-sized animals. Because analysis of large animal specimens is limited  
403 to a resolution of  $400 \mu\text{m}$  (which is potentially larger than fine-scale features, e.g. papulae on  
404 echinoderm surfaces), we performed further analysis on rays of a subset ( $n = 16$ ) of individuals  
405 using micro-computed tomography, which has a resolution of  $20 \mu\text{m}$  (*SI*). The rugosity of  
406 wasting-affected taxa was significantly ( $p = 0.0002$ , Student's t-test,  $df = 4$ ) greater than less-  
407 wasting affected species (Fig. 6). Our observation that more rugose species were more affected  
408 by wasting supports the idea that these individuals may be more susceptible because of their  
409 greater extent (physical distance) of diffusive boundary layers on respiratory surfaces.

410 Much of the intra-species wasting susceptibility may also be explained by inherent variation in  
411 diffusive flux potential. We observed a significant and positive relationship between wasting  
412 lesion genesis rate and animal mass. Larger individuals have a much lower surface area:volume  
413 ratio, where surface area is related to gas flux potential. Under near-surface hypoxic conditions,  
414 or when diffusion is impeded by extensive boundary layers, larger individuals are more strongly  
415 affected than smaller individuals. We also posit that these observations are the result of more  
416 extensive boundary layer height above larger specimens. It is also important to note that ossicle  
417 density varies between species (Blowes et al. 2017), and those taxa with lower densities (e.g.  
418 *Pycnopodia helianthoides*) were more affected than those with higher densities (e.g. *Pisaster*

419 *ochraceus*). Species with lower ossicle densities may be differentially susceptible to wasting  
420 since their structure may be broken down faster by microbial decomposition or apoptotic  
421 processes.

422 Wasting risk susceptibility may furthermore result from differential diffusive flux potential  
423 compared to respiratory demand. We measured the respiration rate (i.e. oxygen demand) of  
424 individuals at the start of each experiment, as well as in individuals of several species that were  
425 both affected by wasting and those that were less or not affected by wasting that were not a part  
426 of experiments to explore whether susceptibility was related to oxygen demand. Mass-  
427 normalized measured respiration rates of asteroids were greatest for *Asterias forbesi*, and least  
428 for *Dermasterias imbricata* and *Patiria miniata* (SI). Both *Pisaster ochraceus* and *Asterias*  
429 *forbesi* respiration rates were considerably more than for other specimens. Measured respiration  
430 rates for entire animals was compared to theoretical maximum diffusion rates into coelomic  
431 fluids (hereafter abbreviated RR:TD). RR:TD was greatest in *Asterias forbesi* and *Pisaster*  
432 *ochraceus* (which were both  $>1$  in most specimens) and least in *Patiria miniata* and  
433 *Dermasterias imbricata* (which were always  $< 0.1$ ). The observed RR:TD corresponds with  
434 wasting susceptibility. Perturbation of O<sub>2</sub> availability in animal surface boundary layers may  
435 skew diffusive flux by elongating diffusive path length or reducing differences in O<sub>2</sub> between  
436 tissues and surrounding seawater. Hence, specimens with a higher RR:TD may be more affected  
437 by the condition than those with lower RR:TD. We cannot account for variable permeability of  
438 outer epidermis between individuals (not measured), and assume that all surface area of asteroids  
439 is involved in respiration (which may be over-estimated, since presumably some component of  
440 this area comprises mineral structures). Some asteroid species inhabiting typically suboxic  
441 environments employ morphological and behavioral strategies to meet O<sub>2</sub> demand, including  
442 nidamental cavities (Johansen and Petersen 1971; Nance 1981), cribiform organs (Shick et al.  
443 1981), epiproctal cones (Shick 1976), active ventilation of burrows and decreased size of  
444 internal organs (Mironov et al. 2016). However, it is unlikely asteroids typically occurring in  
445 normoxic intertidal or subtidal conditions have the ability to morphologically adapt to hypoxic  
446 conditions.

447 **Wasting in a field population follows variation in primary production**

448 BLODL-induced wasting in the field may be fueled by several potential allochthonous and  
449 autochthonous sources of OM. We hypothesize there are two primary sources fueling BLODL:  
450 OM from primary production (phytoplankton and macroalgae), and OM from decaying asteroids.  
451 Most asteroid wasting is reported in late fall or summer, with fewer reports during other times of  
452 the year (Bates et al. 2009; Eckert et al. 1999; Eisenlord et al. 2016; Harvell et al. 2019; Hewson  
453 et al. 2018a; Hewson et al. 2019; Menge et al. 2016; Miner et al. 2018; Montecino-Latorre et al.  
454 2016). We propose that wasting is associated with peak or post-peak declines in phytoplankton  
455 production in overlying waters, which subsequently results in peak dissolved OM availability.  
456 The mean time of wasting mass mortality observed at Langley and Coupeville, Whidbey Island,  
457 fell at or within 1 month after the mean annual maximum of chlorophyll a, minimum DO  
458 concentration, maximum temperature, and minimum rainfall (Fig. 7). Multiple linear regression  
459 (stepwise, backwards selection criteria) revealed a significant model ( $R^2=0.866$ ;  $p=0.001$ ) where  
460 temperature ( $p = 0.006$ ), chlorophyll a ( $p = 0.027$ ) and salinity ( $p = 0.044$ ) explained most  
461 variation in wasting mass mortality, while forward selection ( $R^2=0.774$ ;  $p=0.0002$ ) revealed that  
462 monthly variation in wasting was significantly explained by DO alone. Mass mortality was  
463 significantly related (one-way ANOVA,  $p<0.0001$ ) to elevated chlorophyll in the previous 3  
464 months relative to non-mass mortality months, to elevated salinity, and reduced rainfall (*SI*).  
465 Phytoplankton in the Puget Sound demonstrate variability in peak productivity by location. In  
466 our analysis, chlorophyll a concentration peaked in the central Puget Sound in August, whereas  
467 in other locations peak phytoplankton blooms occur in winter and spring (Horner et al. 2005). In  
468 the northern Strait of Georgia, chlorophyll a peaks in April (i.e. Spring Bloom) with secondary  
469 fall blooms in late October (Suchy et al. 2019). Phytoplankton blooms and their decay results in  
470 hypoxia in Puget Sound waters (Barnes and Collias 1958), where bottom water DO  
471 concentrations have decreased for the past decade (Khangaonkar et al. 2018).

472 The coherence of wasting with primary production in the Salish Sea raises the question of why  
473 wasting mass mortality in the northeast Pacific occurred in the 12 month period following June  
474 2013, especially when asteroids normally persist at sites experiencing very high phytoplankton  
475 biomass and only experienced wasting in 2014 (e.g. Cape Perpetua, OR; (Leslie et al. 2005).  
476 Suchy et al. (2019) observed a prolonged (10 month) period of decreased water column  
477 stratification, concomitant with strong predominately southerly winds in fall 2013 and spring  
478 2014 in the northern Strait of Georgia. Remotely sensed chlorophyll a in the region was also

479 higher in the northern and central Strait of Georgia in late 2013 compared to previous 8 years  
480 and was marked by a significant increase in mid-2013 (Suchy et al. 2019). Mean precipitation  
481 was anomalously lower in mid-summer compared to 1981-2010 means, but then increased  
482 dramatically in late September 2013, prior to wasting onset in October (17). Phytoplankton  
483 abundance in late 2013 was higher than the 1981-2010 average, where peak biomass occurred in  
484 late August (later than previous years) (Moore et al. 2014). Ammonia (NH<sub>3</sub>) concentration was  
485 lowest at the Seattle Aquarium intake in 2013 compared to previous and subsequent years,  
486 presumably a reflection of depletion by phytoplankton uptake (Olsen et al. 2017). Elsewhere,  
487 there is evidence that wasting in 2013 – 2014 was tied to elevated primary production. The high  
488 pCO<sub>2</sub> but low temperature-wasting positive relationship noted in Oregon indicates that upwelling  
489 may have stimulated primary production at this location (Menge et al. 2016). The CALCoFi  
490 program observed highest coastal upwelling on record in 2013 in central California during  
491 wasting onset (Leising et al. 2014). These observations suggest that primary production intensity  
492 and timing in 2013-2014 departed from inter-annual variation in prior years, and has followed  
493 seasonal patterns since 2014. The breaking of drought conditions in late 2014 in some locations  
494 (Hewson et al. 2014) may also have contributed to SSW by delivering enhanced terrestrial OM  
495 to coastal regions. The discontinuous latitudinal emergence of wasting in 2013-2014 and  
496 regional apparent longshore sequence of SSW occurrence is consistent with regional and basin-  
497 scale patterns of organic matter availability. Nearshore primary production is driven by both  
498 groundwater discharge and terrestrial runoff, which positively correlates with previous-year  
499 rainfall in coastal regions, as well as regional upwelling (Santoro et al. 2010). The spatial scale  
500 of phytoplankton blooms sustained solely by terrestrial runoff and groundwater discharge ranges  
501 from 880-3600 km<sup>2</sup> in the Southern California Bight (Santoro et al. 2010). Assuming these  
502 blooms are constrained within 10 km of shore, the areal extent of phytoplankton-derived organic  
503 matter inputs is well within the reported longshore spread of SSW (Hewson et al., 2014).  
504 Upwelling, on the other hand, may affect wider coastal productivity patterns. In 2013, strong  
505 upwelling was recorded between 36°N and 48°N (i.e. 1,332 km). Thus, the apparent density-  
506 dependent local occurrence, and regional spatio-temporal occurrence of SSW is consistent with  
507 spatial variation in decaying asteroid and primary production organic matter. It is interesting to  
508 note that mass mortality in *Heliaster kubiniji* in the Gulf of California occurred during a  
509 prolonged period of heavy rainfall and elevated temperatures prior to El Niño (Dungan et al.

510 1982). Such rainfall may have caused elevated terrestrial discharge, which in turn may have  
511 fueled primary production.

512

### 513 **Wasted asteroids in 2013-2017 bore stable isotopic signatures of anaerobic processes**

514 Because wasting has no pathognomic signs and has been reported for over a century (reviewed in  
515 Hewson et al., 2018), an obvious question is whether BLODL was related to asteroid mass  
516 mortality observed from 2013. While retrospective analyses of O<sub>2</sub> status of asteroids during this  
517 event is not possible, hypoxic conditions impart elemental signatures in tissues of preserved  
518 specimens. We examined the natural abundance of stable isotopes comparing wasting-affected  
519 and grossly normal individuals at the same location and time, in 2013 and 2014. Wasting  
520 asteroids (including *Pisaster ochraceus*, *Pycnopodia helianthoides*, and *Evasterias troschelii*),  
521 had generally higher  $\delta^{15}\text{N}$  in their tissues than asymptomatic tissues at the same site within-  
522 species (ns) except for *Leptasterias* sp., which had significantly lower  $\delta^{15}\text{N}$  in wasting tissues  
523 than in asymptomatic individuals (Fig. 8). On average between species,  $\delta^{15}\text{N}$  was enriched by  $3.9$   
524  $\pm 3.3$  % ( $7.0 \pm 2.8$  % excluding *Leptasterias* sp.) in wasted compared to asymptomatic stars.  
525 Ellipse analysis, which can be used to infer isotopic niches or metabolic differences between  
526 populations (Jackson et al. 2011) suggested that in all paired site-species comparisons wasted  
527 stars have altered C and N metabolisms compared to asymptomatic individuals (*SI*). The  
528 elemental composition of asteroids, like all animals, largely reflects nutritional source, who  
529 obtain anabolic material from consumed prey. Furthermore, asteroids may take up DOM directly  
530 from the water column and use these materials for soft body parts, like tube feet (Ferguson  
531 1967a; Ferguson 1967b). The half-life of isotopic signatures in tissues relates to tissue turnover  
532 and is most stable in ectotherms (Vander Zanden et al. 2015). Dissimilatory anaerobic nitrogen  
533 cycling processes, such as denitrification, shift the balance between  $^{15}\text{N}$  and  $^{14}\text{N}$  (i.e. selecting  
534 against  $^{15}\text{N}$ ), resulting in higher  $\delta^{15}\text{N}$  (ratio of tissue  $^{15}\text{N}$  to atmospheric  $^{15}\text{N}$ ) in environments.  
535 Thus, we restricted our analysis of tissue  $\delta^{15}\text{N}$  to fast-growing, regenerative tube feet which will  
536 therefore reflect the most recent environmental conditions prior to collection. Translocation of  
537 consumed elements to growing tissues is accomplished through continual flux from digestive  
538 glands to these tissues through coelomic fluid (Ferguson 1964). Internal tissues of asteroids are  
539 inhabited by a suite of bacteria and archaea (Jackson et al. 2018) including abundant spirochaetes

540 (Holland and Nealsen 1978; Kelly et al. 1995; Kelly and McKenzie 1995; Nakagawa et al.  
541 2017). Hence, asteroid tube feet tissues, which are distal from digestive glands, may be  
542 influenced by heterotrophic microbial activities which enrich for  $^{15}\text{N}$  over  $^{14}\text{N}$ . Our finding of  
543 higher  $\delta^{15}\text{N}$  in most wasted asteroids supports the hypothesis that wasting is associated with  
544 enhanced anaerobic dissimilatory respiration of nitrogen species, perhaps during translocation of  
545 materials between organs or tissues within asteroids, (Ferguson 1964) or during uptake of  
546 enriched  $^{15}\text{N}$  in DOM pools surrounding affected asteroids (Ferguson 1967a; Ferguson 1967b).

547 To the best of our knowledge, there has only been one previous report on the effects of hypoxia  
548 on stable isotopic composition in animal tissues. Oysters affected by hypoxic water conditions  
549 demonstrated  $\delta^{15}\text{N}$  enrichment, which they propose was due to hypoxia-induced starvation  
550 responses resulting in recycling of internal tissues (Patterson and Carmichael 2018). Asteroids  
551 likewise have similar autophagous responses to starvation, prioritizing somatic maintenance over  
552 reproduction (Aquinas and Nimitz 1976; Harrold and Pearse 1980). Under typical food  
553 availability, reproductive and digestive tissues demonstrate inverse relationships in overall size  
554 relating to spawning and feeding time in most asteroid species. However, the ratio between  
555 reproductive and digestive tissues in *Leptasterias* spp. is synchronous over time in females (but  
556 not so in males), which is different from other starfish species (Menge 1975). We speculate that  
557 the lower  $\delta^{15}\text{N}$  observed in wasting *Leptasterias* spp., an opposite trend to other species, may  
558 relate to timing of autophagous transfer of materials within individuals and timing of predicted  
559 hypoxia (which peaks in late summer) relative to autophagy within animals. It is also possible  
560 that asymptomatic and wasting affected specimens were different species of *Leptasterias* sp.  
561 since they form a cryptic species complex (Melroy et al. 2017), which may affect comparison  
562 between disease states.

### 563 **Further evidence for BLODL association with wasting**

564 Wasting imparts transcriptional and population genetic changes in asteroids and surviving  
565 populations, respectively. In studies comparing gene expression between wasting and  
566 asymptomatic individuals, the relative transcription of high affinity cytochrome c oxidase (*ccb3*;  
567 (Preisig et al. 1996) was higher in symptomatic individuals (Gudenkauf and Hewson 2015).  
568 Furthermore, cytochrome P450 2J6, which plays a dual role in both oxidation and detoxification  
569 of  $\text{H}_2\text{S}$  (Tobler et al. 2014), was expressed in at least two studies of wasting asteroids (Fuess et



570 al. 2015; Gudenkauf and Hewson 2015). Surviving juvenile recruits are genetically distinct to  
571 asteroids before 2013 (Schiebelhut et al. 2018). Loci selected for in surviving populations  
572 correspond to those heightened in experiments with elevated temperature (Ruiz-Ramos et al.  
573 2020). In particular, Ruiz-Ramos et al (2020) found a synchronous decrease in expression of  
574 ND5 (NADH dehydrogenase 5) among field-wasting specimens and those subject to temperature  
575 challenge in aquaria, and corresponding mutation in ND5 in surviving populations. Extracellular  
576 hypoxia causes downregulation of NADH dehydrogenase in vertebrate cells (Piruat and López-  
577 Barneo 2005), and variation in mt ND5 genes is related to hypoxia sensitivity in humans  
578 (Sharma et al. 2019). Elevated temperatures may reduce overall O<sub>2</sub> concentrations in seawater  
579 and cause faster microbial growth rates. Our asteroid associated bacterial culture experiments  
580 illustrate faster growth rates and shorter lag times in OM uptake under warmer conditions.  
581 Hence, previous observations of enhanced temperature corresponding to wasting (Eisenlord et al.  
582 2016; Harvell et al. 2019; Kohl et al. 2016; Miner et al. 2018; Montecino-Latorre et al. 2016) and  
583 with periodic temperature excursion frequency (Aalto et al. 2020) are consistent with the  
584 BLODL model proposed in our work.

## 585 **Conclusion**

586 Here we present evidence to support our hypothesis that wasting is a sequela of BLODL. We  
587 provide evidence that this condition may relate to bacterial abundance/compositional shifts on  
588 asteroid respiratory surfaces, and that this likely results from enrichment with OM. In natural  
589 conditions, this corresponds with seasonal patterns of water column productivity, and in  
590 controlled experiments we demonstrate that algal-derived OM stimulates wasting and OM  
591 release from animal tissues. We also provide evidence for this effect as occurring in specimens  
592 from the 2013 – 2014 mass mortality event. Our results suggest that wasting via this mechanism  
593 may be exacerbated under warmer ocean conditions, or conditions in which labile OM from  
594 terrestrial sources (which may include anthropogenic nutrient pollution) may be present in  
595 coastal environments. Holothurian wasting, bearing similarity to asteroid wasting in gross  
596 disease signs, was anecdotally reported in the Puget Sound and southeast Alaska beginning in  
597 2015 (Jackson et al. 2016). Most urchin diseases are associated with diverse bacteria capable of  
598 anaerobic metabolism (reviewed in Hewson 2019). Hence, BLODL may help explain the

599 variation in etiologies observed between echinoderms and between other invertebrate groups,  
600 especially those that rely on diffusion for respiratory activities.

601 **ACKNOWLEDGEMENTS**

602 The authors are grateful to Jim Nagel (Penn Cove Shellfish Company), Karl Menard (Bodega  
603 Bay Marine Laboratory), Taylor White (UC Santa Cruz), Joe Gaydos, Lizzy Ashley (Seadoc  
604 Society), Martin Haulena (Vancouver Aquarium), Lesanna Lahner (Minnesota Zoo) and Kipp  
605 Quinby for provision of specimens and data; Betsy Steele (UC Santa Cruz), Joel Markis and  
606 Marnie Chapman (University of Alaska Southeast) for use of laboratory space; Kim Sparks and  
607 Elliot Jackson (Cornell University) for laboratory assistance; M. Sewell (U Auckland),  
608 Christopher Mah (Smithsonian) and Thierry Work (USGS) for assistance with experiments and  
609 comments on an early manuscript draft. Asteroid collections were performed under permits CF-  
610 19-107 from the Alaska Department of Fish and Game, 19-149a from the Washington State  
611 Department of Fish and Wildlife and SC-13144 from the California Department of Fish and  
612 Wildlife. This work was supported by US National Science Foundation Grants OCE-1537111  
613 and OCE-1737127 awarded to IH and USGS Contract G19AC00434 awarded to IH and T.  
614 Work.

615

616 **References**

617 Aalto, E. A. and others 2020. Models with environmental drivers offer a plausible mechanism for  
618 the rapid spread of infectious disease outbreaks in marine organisms. *Sci Rep* **10**: 5975.  
619 Amon, R. M. W., and R. Benner. 1996. Bacterial utilization of different size classes of dissolved  
620 organic matter. *Limnol Oceanogr* **41**: 41-51.  
621 Aquinas, S. M., and O.P. Nimitz. 1976. Histochemical changes in gonadal nutrient reserves  
622 correlated with nutrition in the sea stars *Pisaster ochraceus* and *Patiria miniata*. *Biol Bull*  
623 **151**: 357-369.  
624 Barnes, C. A., and E. E. Collias. 1958. Some considerations of oxygen utilization rates in Puget  
625 Sound. *J Mar Res* **17**: 68-80.  
626 Barott, K. L., and F. L. Rohwer. 2012. Unseen players shape benthic competition on coral reefs.  
627 *Trends in Microbiology* **20**: 621-628.  
628 Bates, A. E., B. J. Hilton, and C. D. G. Harley. 2009. Effects of temperature, season and locality  
629 on wasting disease in the keystone predatory sea star *Pisaster ochraceus*. *Dis Aquat Org*  
630 **86**: 245-251.

- 631 Benner, R., J. D. Pakulski, M. McCarthy, J. I. Hedges, and P. G. Hatcher. 1992. Bulk chemical  
632 characteristics of dissolved organic matter in the ocean. *Science* **255**: 1561-1564.
- 633 Blowes, L. M. and others 2017. Body wall structure in the starfish *Asterias rubens*. *J Anat* **231**:  
634 325-341.
- 635 Brocke, H. J., L. Polerecky, D. de Beer, M. Weber, J. Claudet, and M. M. Nugues. 2015. Organic  
636 matter degradation drives benthic cyanobacterial mat abundance on Caribbean coral  
637 reefs. *PLoS One* **10**: e0125445.
- 638 Brodersen, K., M. Lichtenberg, L.-C. Paz, and M. Kühl. 2015. Epiphyte-cover on seagrass  
639 (*Zostera marina* L.) leaves impedes plant performance and radial O<sub>2</sub> loss from the below-  
640 ground tissue. *Front Mar Sci* **2**. <https://doi.org/10.3389/fmars.2015.00058>
- 641 Bucci, C. and others 2017. Sea star wasting disease in *Asterias forbesi* along the Atlantic Coast  
642 of North America. *PLoS One* **12**: 20.
- 643 Buchan, A., G. R. LeCleir, C. A. Gulvik, and J. M. González. 2014. Master recyclers: features  
644 and functions of bacteria associated with phytoplankton blooms. *Nat Rev Microbiol* **12**:  
645 686-698.
- 646 Caporaso, J. G. and others 2011. Global patterns of 16S rRNA diversity at a depth of millions of  
647 sequences per sample. *Proc Nat Acad Sci USA* **108**: 4516-4522.
- 648 Choi, E. J., H. C. Kwon, Y. C. Sohn, and H. O. Yang. 2010. *Kistimonas asteriae* gen. nov., sp.  
649 nov., a gammaproteobacterium isolated from *Asterias amurensis*. *Int J System Evol*  
650 *Microbiol* **60**: 938-943.
- 651 Cole, J. J., and M. L. Pace. 1995. Bacterial secondary production in oxic and anoxic freshwaters.  
652 *Limnol Oceanogr* **40**: 1019-1027.
- 653 David, I. K., M. K. Neilan, B. Mya, K. Nancy, and R. Forest. 2006. Role of elevated organic  
654 carbon levels and microbial activity in coral mortality. *Mar Ecol Progr Ser* **314**: 119-125.
- 655 Denner, D. R. and others 2016. Corticosteroid therapy and airflow obstruction influence the  
656 bronchial microbiome, which is distinct from that of bronchoalveolar lavage in asthmatic  
657 airways. *J Allerg Clin Immunol* **137**: 1398.
- 658 Diaz, R. J. 2001. Overview of hypoxia around the world. *J Environ Qual* **30**: 275-281.
- 659 Diaz, R. J., and R. Rosenberg. 1995. Marine benthic hypoxia: A review of its ecological effects  
660 and the behavioural responses of benthic macrofauna. *Oceanogr Mar Biol Ann Rev* **33**:  
661 245-303.

- 662 ---. 2008. Spreading dead zones and consequences for marine ecosystems. *Science* **321**: 926-929.
- 663 Dinsdale, E. A. and others 2008. Microbial ecology of four coral atolls in the Northern Line  
664 Islands. *PLoS One* **3**: e1584.
- 665 Dinsdale, E. A., and F. Rohwer. 2011. Fish or germs? Microbial dynamics associated with  
666 changing trophic structures on coral reefs, p. 231-240. *In* Z. Dubinsky and N. Stambler  
667 [eds.], *Coral Reefs: An Ecosystem in Transition*. Springer Netherlands.
- 668 Ducklow, H. W. 1983. Production and fate of bacteria in the oceans. *Bioscience* **33**: 494-501.
- 669 Dungan, M. L., T. E. Miller, and D. A. Thomson. 1982. Catastrophic decline of a top carnivore  
670 in the Gulf of California rocky intertidal zone. *Science* **216**: 989-991.
- 671 Eckert, G., J. M. Engle, and D. Kushner. 1999. Sea star disease and population declines at the  
672 Channel Islands, p. 435-441. 6th California Islands Symposium.
- 673 Eisenlord, M. E. and others 2016. Ochre star mortality during the 2014 wasting disease  
674 epizootic: role of population size structure and temperature. *Phil Transact Roy Soc B*  
675 **371**: 20150212.
- 676 Ferguson, J. C. 1964. Nutrient transport in starfish. I. Properties of the coelomic fluid. *Biol Bull*  
677 **126**: 33-53.
- 678 ---. 1967a. An autoradiographic study of the utilization of free exogenous amino acids by  
679 starfishes. *Biol Bull* **133**: 317-329.
- 680 ---. 1967b. Utilization of dissolved exogenous nutrients by the starfishes, *Asterias forbesi* and  
681 *Henricia sanguinolenta*. *Biol Bull* **132**: 161-173.
- 682 Fonseca, M. S., and W. J. Kenworthy. 1987. Effects of current on photosynthesis and distribution  
683 of seagrasses. *Aquat Bot* **27**: 59-78.
- 684 Fuess, L. E. and others 2015. Up in arms: Immune and nervous system response to sea star  
685 wasting disease. *PLoS One* **10**: e0133053.
- 686 Gregg, A. K. and others 2013. Biological oxygen demand optode analysis of coral reef-  
687 associated microbial communities exposed to algal exudates. *PeerJ* **1**: e107.
- 688 Gudenkauf, B. M., and I. Hewson. 2015. Metatranscriptomic analysis of *Pycnopodia*  
689 *helianthoides* (Asteroidea) affected by sea star wasting disease. *PLoS One* **10**: e0128150.
- 690 Guilloux, C. A., C. Lamoureux, and G. Hery-Arnaud. 2018. Anaerobic bacteria, the unknown  
691 members of the lung microbiota. *Med Sci* **34**: 253-260.
- 692 Haas, A. F. and others 2016. Global microbialization of coral reefs. *Nature Microbiol* **1**: 16042.

- 693 Haas, A. F., M. S. Naumann, U. Struck, C. Mayr, M. el-Zibdah, and C. Wild. 2010. Organic  
694 matter release by coral reef associated benthic algae in the Northern Red Sea. *J Exper*  
695 *Mar Biol Ecol* **389**: 53-60.
- 696 Haas, A. F. and others 2011. Effects of coral reef benthic primary producers on dissolved organic  
697 carbon and microbial activity. *PLoS One* **6**: e27973-e27973.
- 698 Harrold, C., and J. S. Pearse. 1980. Allocation of pyloric caecum reserves in FED and starved  
699 sea stars, *Pisaster giganteus* (Stimpson): Somatic maintenance comes before  
700 reproduction. *J Exper Mar Biol Ecol* **48**: 169-183.
- 701 Harvell, C. D. and others 2019. Disease epidemic and a marine heat wave are associated with the  
702 continental-scale collapse of a pivotal predator *Pycnopodia helianthoides*. *Science*  
703 *Advances* **5**: eaau7042.
- 704 Hewson, I. 2019. Technical pitfalls that bias comparative microbial community analyses of  
705 aquatic disease. *Dis Aquat Organ* **137**: 109-124.
- 706 Hewson, I. and others 2018. Investigating the complex association between viral ecology,  
707 environment, and Northeast Pacific sea star wasting. *Front Mar Sci* **5**.  
708 <https://doi.org/10.3389/fmars.2018.00077>
- 709 Hewson, I. and others 2014. Densovirus associated with sea-star wasting disease and mass  
710 mortality. *Proc Nat Acad Sci USA* **111**: 17276-17283.
- 711 Hewson, I. and others 2019. Perspective: Something old, something new? Review of wasting and  
712 other mortality in Asteroidea (Echinodermata). *Front Mar Sci* **6**.  
713 <https://doi.org/10.3389/fmars.2019.00406>
- 714 Høj, L. and others 2018. Crown-of-thorns sea star *Acanthaster cf. solaris* has tissue-  
715 characteristic microbiomes with potential roles in health and reproduction. *Appl Environ*  
716 *Microbiol* **84**. DOI: 10.1128/AEM.00181-18
- 717 Holland, N. D., and K. H. Nealson. 1978. Fine-structure of the echinoderm cuticle and the sub-  
718 cuticular bacteria of echinoderms. *Acta Zool* **59**: 169-185.
- 719 Horner, R. A., J. R. Postel, C. Halsband-Lenk, J. J. Pierson, G. Pohnert, and T. Wichard. 2005.  
720 Winter-spring phytoplankton blooms in Dabob Bay, Washington. *Progr Oceanogr* **67**:  
721 286-313.



- 722 Hurd, C. L. and others 2011. Metabolically induced pH fluctuations by some coastal calcifiers  
723 exceed projected 22nd century ocean acidification: a mechanism for differential  
724 susceptibility? *Global Change Biol* **17**: 3254-3262.
- 725 Jackson, A. L., R. Inger, A. C. Parnell, and S. Bearhop. 2011. Comparing isotopic niche widths  
726 among and within communities: SIBER - Stable Isotope Bayesian Ellipses in R. *J Anim*  
727 *Ecol* **80**: 595-602.
- 728 Jackson, E. W., K. S. I. Bistolas, J. B. Button, and I. Hewson. 2016. Novel circular single-  
729 stranded DNA viruses among an asteroid, echinoid and holothurian (Phylum:  
730 Echinodermata). *PLoS One* **11**: e0166093.
- 731 Jackson, E. W., C. Pepe-Ranney, S. J. Debenport, D. H. Buckley, and I. Hewson. 2018. The  
732 microbial landscape of sea stars and the anatomical and interspecies variability of their  
733 microbiome. *Front Microbiol* **9**: 12.
- 734 Jackson, E. W., C. Pepe-Ranney, M. R. Johnson, D. L. Distel, and I. Hewson. 2020. A highly  
735 prevalent and pervasive densovirus discovered among sea stars from the North American  
736 Atlantic Coast. *Appl Environ Microbiol* **86**. DOI: 10.1128/AEM.02723-19
- 737 Jaffe, N., R. Eberl, J. Bucholz, and C. S. Cohen. 2019. Sea star wasting disease demography and  
738 etiology in the brooding sea star *Leptasterias* spp. *PLoS One* **14**: e0225248.
- 739 Johansen, K., and J. A. Petersen. 1971. Gas exchange and active ventilation in a starfish,  
740 *Pteraster tesselatus*. *Zeitschrift für vergleichende Physiologie* **71**: 365-381.
- 741 Jørgensen, B. B., and N. P. Revsbech. 1985. Diffusive boundary layers and the oxygen uptake of  
742 sediments and detritus. *Limnol Oceanogr* **30**: 111-122.
- 743 Kay, S. W. C., A.-L. M. Gehman, and C. D. G. Harley. 2019. Reciprocal abundance shifts of the  
744 intertidal sea stars, *Evasterias troschelii* and *Pisaster ochraceus*, following sea star  
745 wasting disease. *Proc Roy Soc B* **286**: 20182766.
- 746 Kelly, L. W. and others 2014. Local genomic adaptation of coral reef-associated microbiomes to  
747 gradients of natural variability and anthropogenic stressors. *Proc Nat Acad Sci USA* **111**:  
748 10227-10232.
- 749 Kelly, M. S., M. F. Barker, J. D. McKenzie, and J. Powell. 1995. The incidence and morphology  
750 of subcuticular bacteria in the echinoderm fauna of New Zealand. *Biol Bull* **189**: 91-105.

- 751 Kelly, M. S., and J. D. McKenzie. 1995. Survey of the occurrence and morphology of sub-  
752 cuticular bacteria in shelf echinoderms from the Northeast Atlantic Ocean. *Mar Biol* **123**:  
753 741-756.
- 754 Khangaonkar, T. and others 2018. Analysis of hypoxia and sensitivity to nutrient pollution in  
755 Salish Sea. *J Geophys Res Oceans* **123**: 4735-4761.
- 756 Koch, E. W. 1994. Hydrodynamics, diffusion-boundary layers and photosynthesis of the  
757 seagrasses *Thalassia testudinum* and *Cymodocea nodosa*. *Mar Biol* **118**: 767-776.
- 758 Kohl, W. T., T. I. McClure, and B. G. Miner. 2016. Decreased temperature facilitates short-term  
759 sea star wasting disease survival in the keystone intertidal sea star *Pisaster ochraceus*.  
760 *PLoS One* **11**: e0153670.
- 761 Konar, B. and others 2019. Wasting disease and static environmental variables drive sea star  
762 assemblages in the Northern Gulf of Alaska. *J Exper Mar Biol Ecol* **520**: 151209.
- 763 Legrand, T. and others 2018. The inner workings of the outer surface: Skin and gill microbiota as  
764 indicators of changing gut health in Yellowtail Kingfish. *Front Microbiol* **8**: 17.
- 765 Leising, A. W. and others 2014. State of the California Current 2013-2014: El Nino Looming.  
766 *CalCOFI Report* **55**: 51-87.
- 767 Leslie, H. M., E. N. Breck, F. Chan, J. Lubchenco, and B. A. Menge. 2005. Barnacle  
768 reproductive hotspots linked to nearshore ocean conditions. *Proc Nat Acad Sci USA* **102**:  
769 10534-10539.
- 770 Levin, L. A. 2003. Oxygen minimum zone benthos: Adaptation and community response to  
771 hypoxia. *Oceanogr Mar Biol Ann Rev* **41**: 1-45.
- 772 Levin, L. A. and others 2009. Effects of natural and human-induced hypoxia on coastal benthos.  
773 *Biogeosciences* **6**: 2063-2098.
- 774 Lloyd, M. M., and M. H. Pespeni. 2018. Microbiome shifts with onset and progression of sea star  
775 wasting disease revealed through time course sampling. *Sci Rep* **8**: 12.
- 776 Mead, A. D. 1898. Twenty-eighth Annual Report of the Commissioners of Inland Fisheries,  
777 Made to the General Assembly at Its January Session, 1898, p. 112. *In* J. M. K.  
778 Southwick et al. [eds.].
- 779 Melroy, L. M., R. J. Smith, and C. S. Cohen. 2017. Phylogeography of direct-developing sea  
780 stars in the genus *Leptasterias* in relation to San Francisco Bay outflow in central  
781 California. *Mar Biol* **164**.

- 782 Menge, B. A. 1975. Brood or broadcast? The adaptive significance of different reproductive  
783 strategies in the two intertidal sea stars *Leptasterias hexactis* and *Pisaster ochraceus*. Mar  
784 Biol **31**: 87-100.
- 785 Menge, B. A., E. B. Cerny-Chipman, A. Johnson, J. Sullivan, S. Gravem, and F. Chan. 2016. Sea  
786 star wasting disease in the keystone predator *Pisaster ochraceus* in Oregon: Insights into  
787 differential population impacts, recovery, predation rate, and temperature effects from  
788 long-term research. PLoS One **11**: e0153994.
- 789 Meyer, J. L., J. Castellanos-Gell, G. S. Aeby, C. C. Häse, B. Ushijima, and V. J. Paul. 2019.  
790 Microbial community shifts associated with the ongoing stony coral tissue loss disease  
791 outbreak on the Florida Reef Tract. Front Microbiol **10**. doi: 10.3389/fmicb.2019.02244
- 792 Miner, C. M. and others 2018. Large-scale impacts of sea star wasting disease (SSWD) on  
793 intertidal sea stars and implications for recovery. PLoS One **13**: e0192870.
- 794 Mironov, A. N., A. B. Dilman, I. P. Vladychenskaya, and N. B. Petrov. 2016. Adaptive strategy  
795 of the Porcellanasterid sea stars. Biol Bull **43**: 503-516.
- 796 Montecino-Latorre, D. and others 2016. Devastating transboundary impacts of sea star wasting  
797 disease on subtidal asteroids. PLoS One **11**: e0163190.
- 798 Moore, S. K., K. Stark, J. Bos, P. Williams, J. Newton, and K. Dzinbal. 2014. Puget sound  
799 marine waters: 2013 overview. In P. S. E. M. P. M. W. Workgroup [ed.].
- 800 Murphy, R. R., W. M. Kemp, and W. P. Ball. 2011. Long-term trends in Chesapeake Bay  
801 seasonal hypoxia, stratification, and nutrient loading. Est Coast **34**: 1293-1309.
- 802 Nakagawa, S. and others 2017. Microbiota in the coelomic fluid of two common coastal starfish  
803 species and characterization of an abundant *Helicobacter*-related taxon. Sci Rep **7**: 8764.
- 804 Nakajima, R. and others 2018. Release of dissolved and particulate organic matter by the soft  
805 coral Lobophytum and subsequent microbial degradation. J Exper Mar Biol Ecol **504**:  
806 53-60.
- 807 Nance, J. M. 1981. Respiratory water flow and production of mucus in the cushion star,  
808 *Pteraster tesselatus* Ives (Echinodermata: Asteroidea). J Exper Mar Biol Ecol **50**: 21-31.
- 809 Nepf, H. M. 2011. 2.13 - Flow Over and Through Biota, p. 267-288. In E. Wolanski and D.  
810 McLusky [eds.], Treatise on Estuarine and Coastal Science. Academic Press.
- 811 Noble, R. T., and J. A. Fuhrman. 1998. Use of SYBR Green I rapid epifluorescence counts of  
812 marine viruses and bacteria. Aquat Microb Ecol **14**: 113-118.

- 813 Nugues, M. M., G. W. Smith, R. J. van Hooidonk, M. I. Seabra, and R. P. M. Bak. 2004. Algal  
814 contact as a trigger for coral disease. *Ecol Lett* **7**: 919-923.
- 815 Nunez-Pons, L., T. M. Work, C. Angulo-Preckler, J. Moles, and C. Avila. 2018. Exploring the  
816 pathology of an epidermal disease affecting a circum-Antarctic sea star. *Sci Rep* **8**: 12.
- 817 Ochiai, M., T. Nakajima, and T. Hanya. 1980. Chemical composition of labile fractions in DOM.  
818 *Hydrobiol* **71**: 95-97.
- 819 Ogawa, H., and E. Tanoue. 2003. Dissolved organic matter in oceanic waters. *J Oceanogr* **59**:  
820 129-147.
- 821 Olsen, A. Y., A. Smith, and S. Larson. 2017. A temporal analysis of water quality variability at  
822 the Seattle Aquarium in Elliott Bay, Puget Sound, WA, p. 55-69. *In* M. Glavan [ed.],  
823 *Water Challenges of an Urbanizing World*. IntechOpen.
- 824 Patterson, H. K., and R. H. Carmichael. 2018. Dissolved oxygen concentration affects  $\delta^{15}\text{N}$   
825 values in oyster tissues: implications for stable isotope ecology. *Ecosphere* **9**: e02154.
- 826 Pinhassi, J. and others 2004. Changes in bacterioplankton composition under different  
827 phytoplankton regimens. *Appl Environ Microbiol* **70**: 6753-6766.
- 828 Piruat, J. I., and J. López-Barneo. 2005. Oxygen tension regulates mitochondrial DNA-encoded  
829 complex I gene expression. *J Biol Chem* **280**: 42676-42684.
- 830 Pohlner, M., L. Dlugosch, B. Wemheuer, H. Mills, B. Engelen, and B. K. Reese. 2019. The  
831 majority of active *Rhodobacteraceae* in marine sediments belong to uncultured genera: A  
832 molecular approach to link their distribution to environmental conditions. *Front*  
833 *Microbiol* **10**. <https://doi.org/10.3389/fmicb.2019.00659>
- 834 Porter, K. G., and Y. S. Feig. 1980. The use of DAPI for identifying and counting aquatic  
835 microflora. *Limnol Oceanogr* **25**: 943-948.
- 836 Preisig, O., R. Zufferey, L. Thöny-Meyer, C. A. Appleby, and H. Hennecke. 1996. A high-  
837 affinity *cbb3*-type cytochrome oxidase terminates the symbiosis-specific respiratory  
838 chain of *Bradyrhizobium japonicum*. *J Bacteriol* **178**: 1532-1538.
- 839 Propp, M. V., V. I. Ryabushko, A. A. Zhuchikhina, and L. N. Propp. 1983. Seasonal changes in  
840 respiration, ammonia and phosphate excretion, and activity of carbohydrate-metabolism  
841 enzymes in four echinoderm species from the sea of Japan. *Comp Biochem Physiol B* **75**:  
842 707-711.

- 843 Reverter, M., P. Sasal, N. Tapissier-Bontemps, D. Lecchini, and M. Suzuki. 2017.  
844 Characterisation of the gill mucosal bacterial communities of four butterflyfish species: a  
845 reservoir of bacterial diversity in coral reef ecosystems. *FEMS Microbiol Ecol* **93**: 10.
- 846 Roach, T. N. F. and others 2017. Microbial bioenergetics of coral-algal interactions. *PeerJ* **5**:  
847 e3423.
- 848 Romanenko, L. A., N. V. Zhukova, M. Rohde, A. M. Lysenko, V. V. Mikhailov, and E.  
849 Stackebrandt. 2003. *Glaciecola mesophila* sp. nov., a novel marine agar-digesting  
850 bacterium. *Int J System Evol Microbiol* **53**: 647-651.
- 851 Rosado, D., M. Pérez-Losada, R. Severino, J. Cable, and R. Xavier. 2019. Characterization of the  
852 skin and gill microbiomes of the farmed seabass (*Dicentrarchus labrax*) and seabream  
853 (*Sparus aurata*). *Aquaculture* **500**: 57-64.
- 854 Ruiz-Ramos, D. V., L. M. Schiebelhut, K. J. Hoff, J. P. Wares, and M. N. Dawson. 2020. An  
855 initial comparative genomic autopsy of wasting disease in sea stars. *Molecular Ecology*  
856 **29**: 1087-1102.
- 857 Santoro, A. E., N. J. Nidzieko, G. L. v. Dijken, K. R. Arrigo, and A. B. Boehma. 2010.  
858 Contrasting spring and summer phytoplankton dynamics in the nearshore Southern  
859 California Bight. *Limnol Oceanogr* **55**: 264-278.
- 860 Sato, Y. and others 2017. Unraveling the microbial processes of black band disease in corals  
861 through integrated genomics. *Sci Rep* **7**: 40455.
- 862 Schiebelhut, L. M., J. B. Puritz, and M. N. Dawson. 2018. Decimation by sea star wasting  
863 disease and rapid genetic change in a keystone species, *Pisaster ochraceus*. *Proc Nat*  
864 *Acad Sci USA* **115**: 7069-7074.
- 865 Schultz, J. A., R. N. Cloutier, and I. M. Cote. 2016. Evidence for a trophic cascade on rocky  
866 reefs following sea star mass mortality in British Columbia. *PeerJ* **4**: 19.
- 867 Sharma, S. and others 2019. Mitochondrial DNA sequencing reveals association of variants and  
868 haplogroup M33a2'3 with high altitude pulmonary edema susceptibility in Indian male  
869 lowlanders. *Sci Rep* **9**.
- 870 Shibata, A., Y. Goto, H. Saito, T. Kikuchi, T. Toda, and S. Taguchi. 2006. Comparison of SYBR  
871 Green I and SYBR Gold stains for enumerating bacteria and viruses by epifluorescence  
872 microscopy. *Aquat Microb Ecol* **43**: 223-231.

- 873 Shick, J. M. 1976. Physiological and behavioral responses to hypoxia and hydrogen sulfide in the  
874 infaunal asteroid *Ctenodiscus crispatus*. *Mar Biol* **37**: 279-289.
- 875 Shick, J. M., K. C. Edwards, and J. H. Dearborn. 1981. Physiological ecology of the deposit-  
876 feeding sea star *Ctenodiscus crispatus* - Ciliated surfaces and animal-sediment  
877 interactions. *Mar Ecol Progr Ser* **5**: 165-184.
- 878 Siebers, D. 1979. Transintegumentary uptake of dissolved amino acids in the sea star *Asterias*  
879 *rubens* - Reassessment of its nutritional role with special reference to the significance of  
880 heterotrophic bacteria. *Mar Ecol Progr Ser* **1**: 169-177.
- 881 Siebers, D. 2015. Bacterial—invertebrate interactions in uptake of dissolved organic matter.  
882 *Amer Zool* **22**: 723-733.
- 883 Silverman J.D., Washburne A.D., Mukherjee S., & David L.A. 2017. A phylogenetic transform  
884 enhances analysis of compositional microbiota data. *eLife* **6**:e21887
- 885 Smith, J. E. and others 2006. Indirect effects of algae on coral: algae-mediated, microbe-induced  
886 coral mortality. *Ecol Lett* **9**: 835-845.
- 887 Spence, C. D. and others 2020. Influence of azithromycin and allograft rejection on the post-lung  
888 transplant microbiota. *J Heart Lung Transplant* **39**: 176-183.
- 889 Suchy, K. D., N. Le Baron, A. Hilborn, R. I. Perry, and M. Costa. 2019. Influence of  
890 environmental drivers on spatio-temporal dynamics of satellite-derived chlorophyll a in  
891 the Strait of Georgia. *Progr Oceanogr* **176**: 102134.
- 892 Thiele, S., M. Richter, C. Balestra, F. O. Glöckner, and R. Casotti. 2017. Taxonomic and  
893 functional diversity of a coastal planktonic bacterial community in a river-influenced  
894 marine area. *Mar Genom* **32**: 61-69.
- 895 Thornton, D. C. O. 2014. Dissolved organic matter (DOM) release by phytoplankton in the  
896 contemporary and future ocean. *Eur J Phycol* **49**: 20-46.
- 897 Thurber, R. L. V. and others 2008. Metagenomic analysis indicates that stressors induce  
898 production of herpes-like viruses in the coral *Porites compressa*. *Proc Nat Acad Sci USA*  
899 **105**: 18413-18418.
- 900 Thurber, R. V., M. Haynes, M. Breitbart, L. Wegley, and F. Rohwer. 2009. Laboratory  
901 procedures to generate viral metagenomes. *Nat Protoc* **4**: 470-483.



- 902 Tobler, M., C. Henpita, B. Bassett, J. L. Kelley, and J. H. Shaw. 2014. H<sub>2</sub>S exposure elicits  
903 differential expression of candidate genes in fish adapted to sulfidic and non-sulfidic  
904 environments. *Comp Biochem Physiol A* **175**: 7-14.
- 905 Vander Zanden, M. J., M. K. Clayton, E. K. Moody, C. T. Solomon, and B. C. Weidel. 2015.  
906 Stable isotope turnover and half-life in animal tissues: A literature synthesis. *PLoS One*  
907 **10**: e0116182.
- 908 Vistisen, B., and B. Vismann. 1997. Tolerance to low oxygen and sulfide in *Amphiura filiformis*  
909 and *Ophiura albida* (Echinodermata: Ophiuroidea). *Mar Biol* **128**: 241-246.
- 910 Wang, K. and others 2019. A preliminary study of microbiota diversity in saliva and  
911 bronchoalveolar lavage fluid from patients with primary bronchogenic carcinoma. *Med*  
912 *Sci Monit* **25**: 2819-2834.
- 913 Washburne A.D., and others. 2017. Phylogenetic factorization of compositional data yields  
914 lineage-level associations in microbiome datasets. *PeerJ* **5**:e2969.
- 915 Wu, Y., I. Klapper, and P. S. Stewart. 2018. Hypoxia arising from concerted oxygen  
916 consumption by neutrophils and microorganisms in biofilms. *Pathog Dis* **76**: fty043.
- 917
- 918

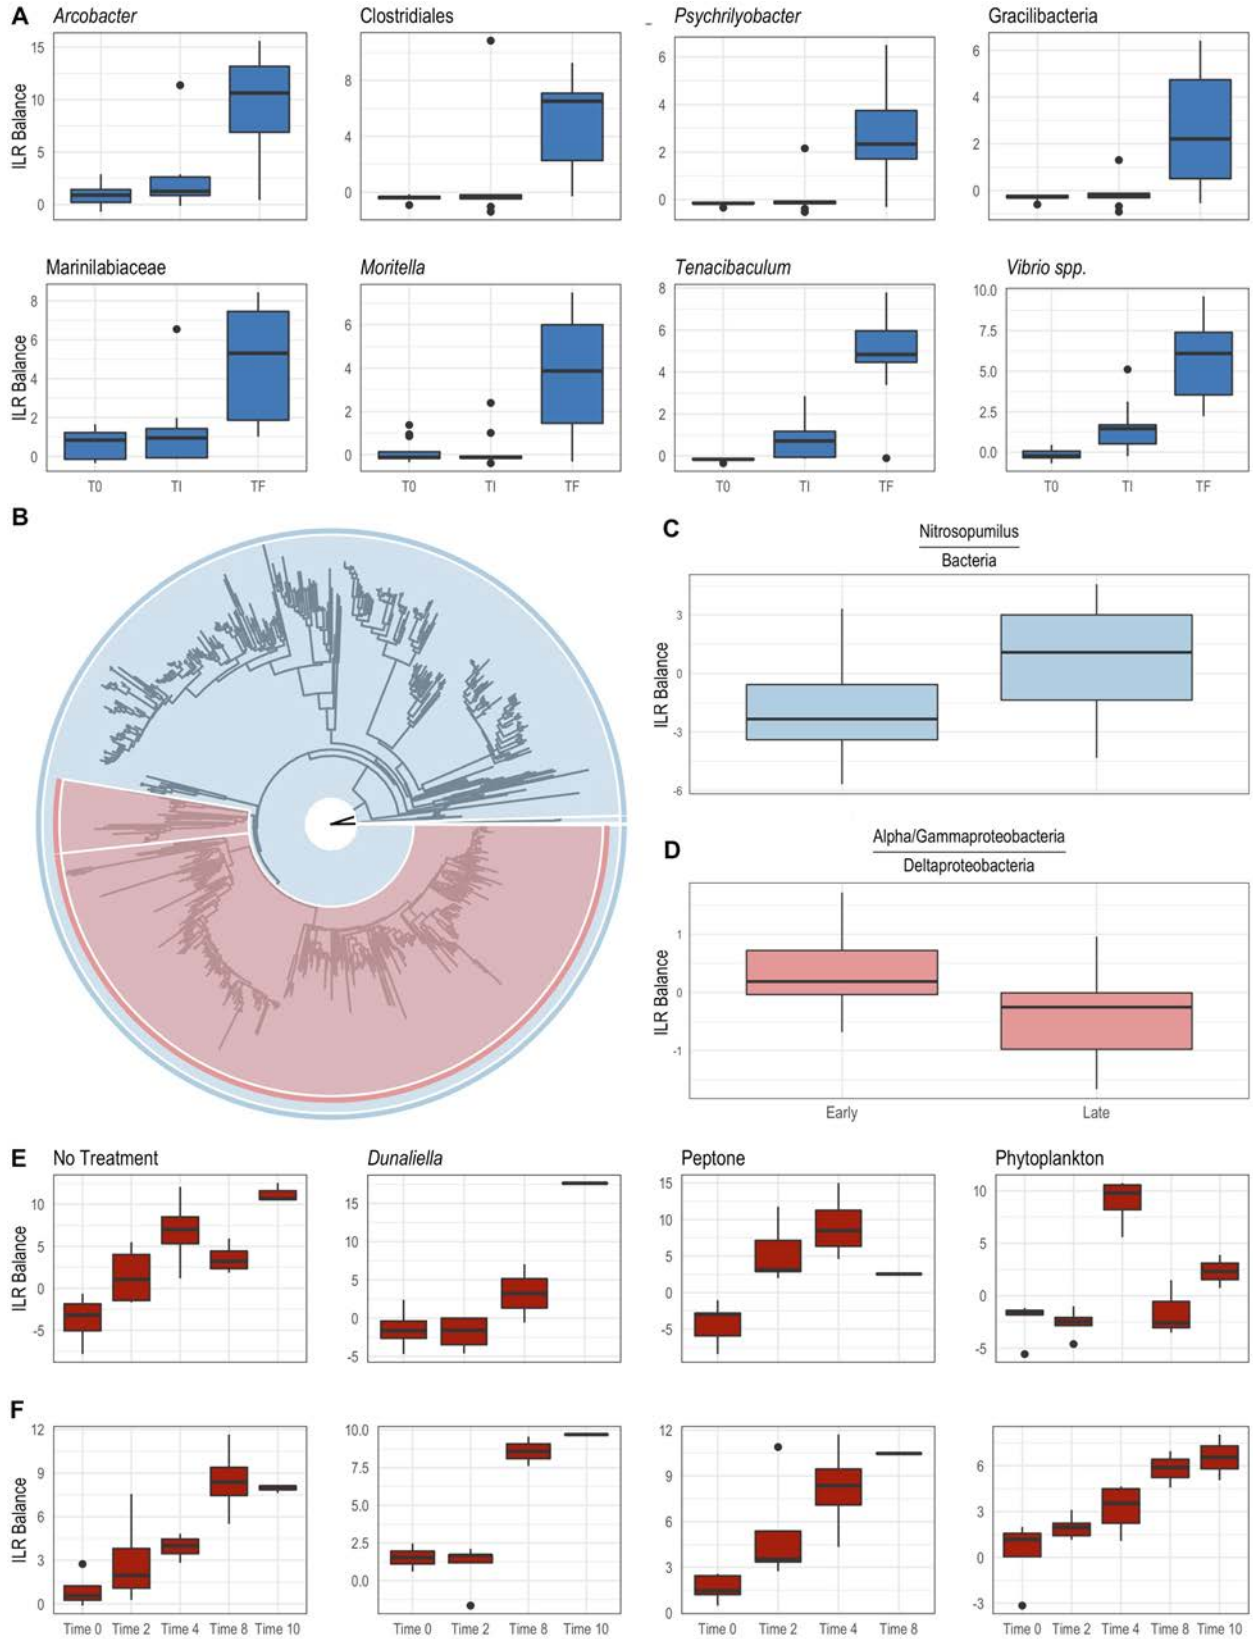

**Fig. 1:** Differential abundance of bacterial taxa from body wall samples (A; *P. ochraceus* June 2018) and surface swabs (B-F; *P. ochraceus* August 2019). (A) Boxplots were derived using PhyloFactor (Washburne et al. 2017), which uses a generalized linear model to regress the isometric log-ratio (ILR balance) between opposing clades (contrasted by an edge) on a phylogenetic tree. This was done iteratively, with each iteration, or factor, maximizing the F statistic from regression. Shown taxa represent either a single factor or combination of factors (when, for example, multiple factors identified different sOTUs with the same taxonomic classification). Labels represent either the highest taxonomic resolution or the highest classification shared by all sOTUs of a given clade. T0 = experiment commencement, TI = lesion genesis, TF = time of death. (B-D) Balance contrast of early (before lesion genesis) samples compared to late (immediately prior to lesion genesis) samples. Samples were transformed using the Phylogenetic Isometric Log-Ratio (PhILR; Silverman et al. 2017) transform, which uses a phylogenetic tree (B) to convert an sOTU table into a new matrix of coordinates derived from the ILR of clades that descend from a common node. We used a sparse logistic regression with an  $l_1$  penalty of  $\lambda=0.15$  (Silverman et al. 2017) to analyze the ILR at each node, and included a select number of ‘balances’ with positive coefficients (C-D). (C) is the balance of *Nitrosopumilus* (colored blue in (B), comprises the thin sliver on the right side of the tree) relative to the rest of the dataset (also shown in blue in (B)). A positive shift indicates an increase in *Nitrosopumilus* relative to its denominator. (D) is the balance between a clade of Alpha/Gammaproteobacteria (large, red clade in (B)) and Deltaproteobacteria (Bdellovibrionales and Desulfobacterales; small, red clade in (B)). A negative shift indicates that the denominator, Deltaproteobacteria, is increasing relative to Alpha/Gammaproteobacteria. (E) and (F) were derived from a PhyloFactor object and show the ILR balance of Flavobacteriales (E) and Rhodobacterales (F) relative to all other sOTUs. Time 0 = experiment commencement. All subsequent times show the day the sample was taken. Organic amendment is given above boxplots.

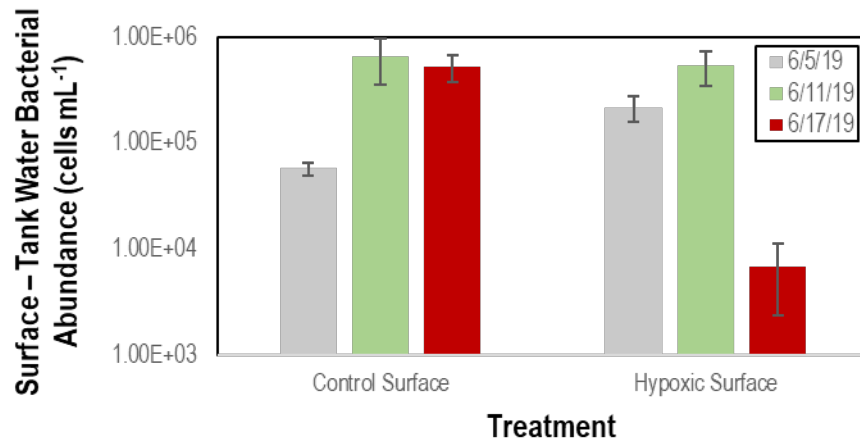

**Fig. 2:** Bacterial abundance in surface layer above *Asterias forbesi* during hypoxic and control treatments (n = 12 each). The abundance was corrected for aquarium water bacterial abundance and measured by SYBR Gold epifluorescence microscopy.

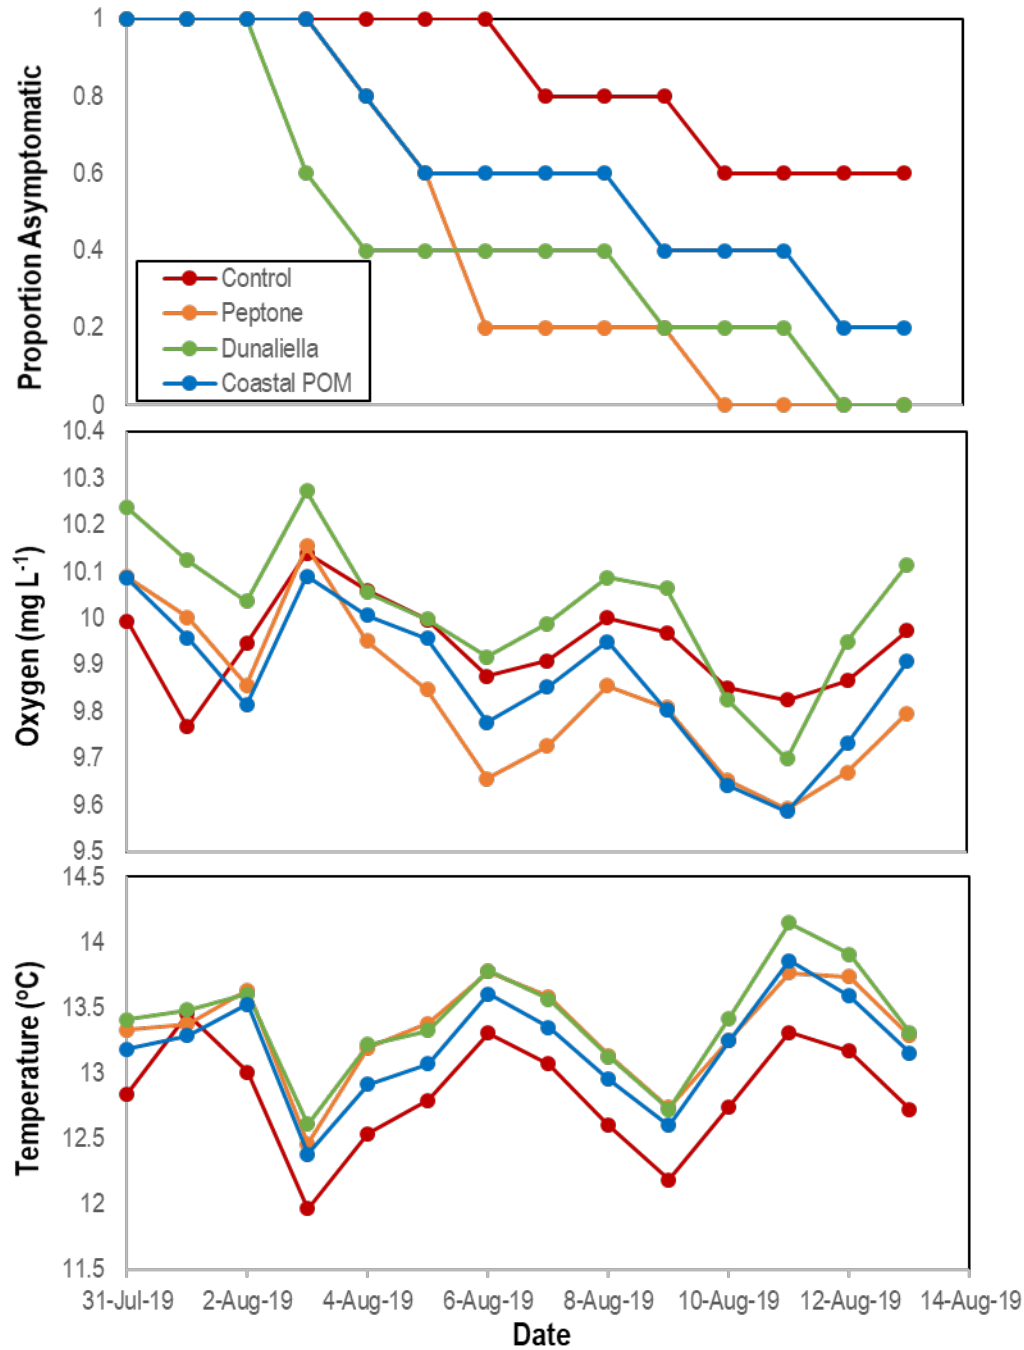

**Fig 3:** Proportion of asymptomatic *P. ochraceus* ( $n = 5$  each treatment) incubated in flow-through conditions at the Bodega Marine Lab in response to organic matter enrichments (Peptone, *Dunaliella tertiolecta* culture POM, and coastal POM collected from the inflow at the Bodega Marine Laboratory in August 2019. Dissolved O<sub>2</sub> and temperature were measured in flow-through sea tables bearing each OM treatment.

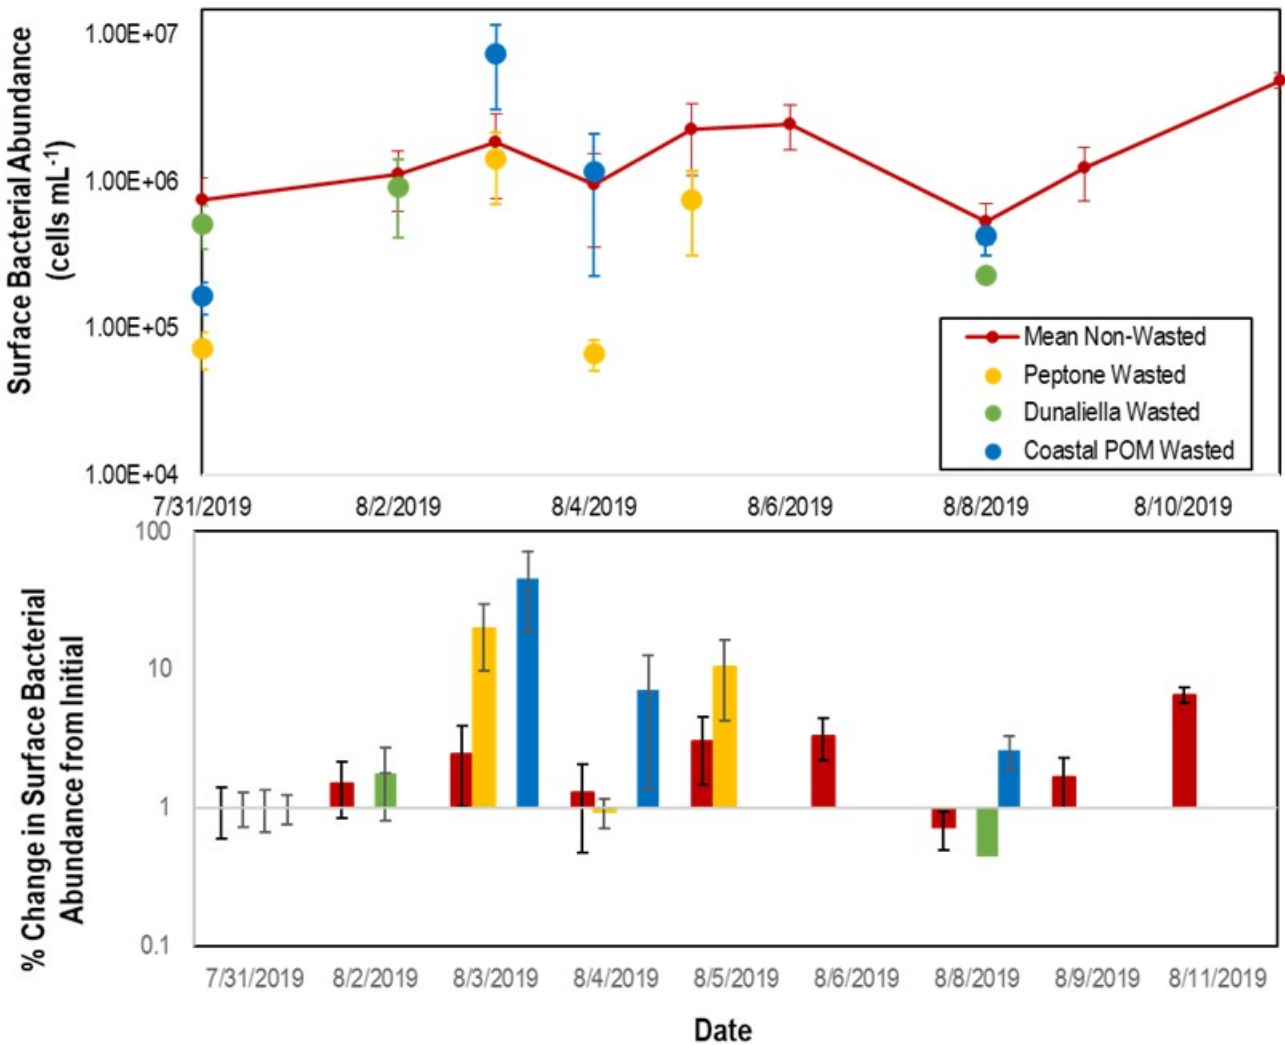

**Fig 4:** Abundance of bacteria in proximity to *P. ochraceus* surfaces (top) and percentage change from initial (below) during first 10 days of experiment in response to organic matter enrichment ( $n = 5$  for each treatment) as assessed by SYBR Gold staining and epifluorescence microscopy. Non-wasted stars, regardless of treatment, are indicated in red, while the mean of stars that wasted in Peptone, *Dunaliella tertiolecta* POM, and Coastal POM are indicated separately.



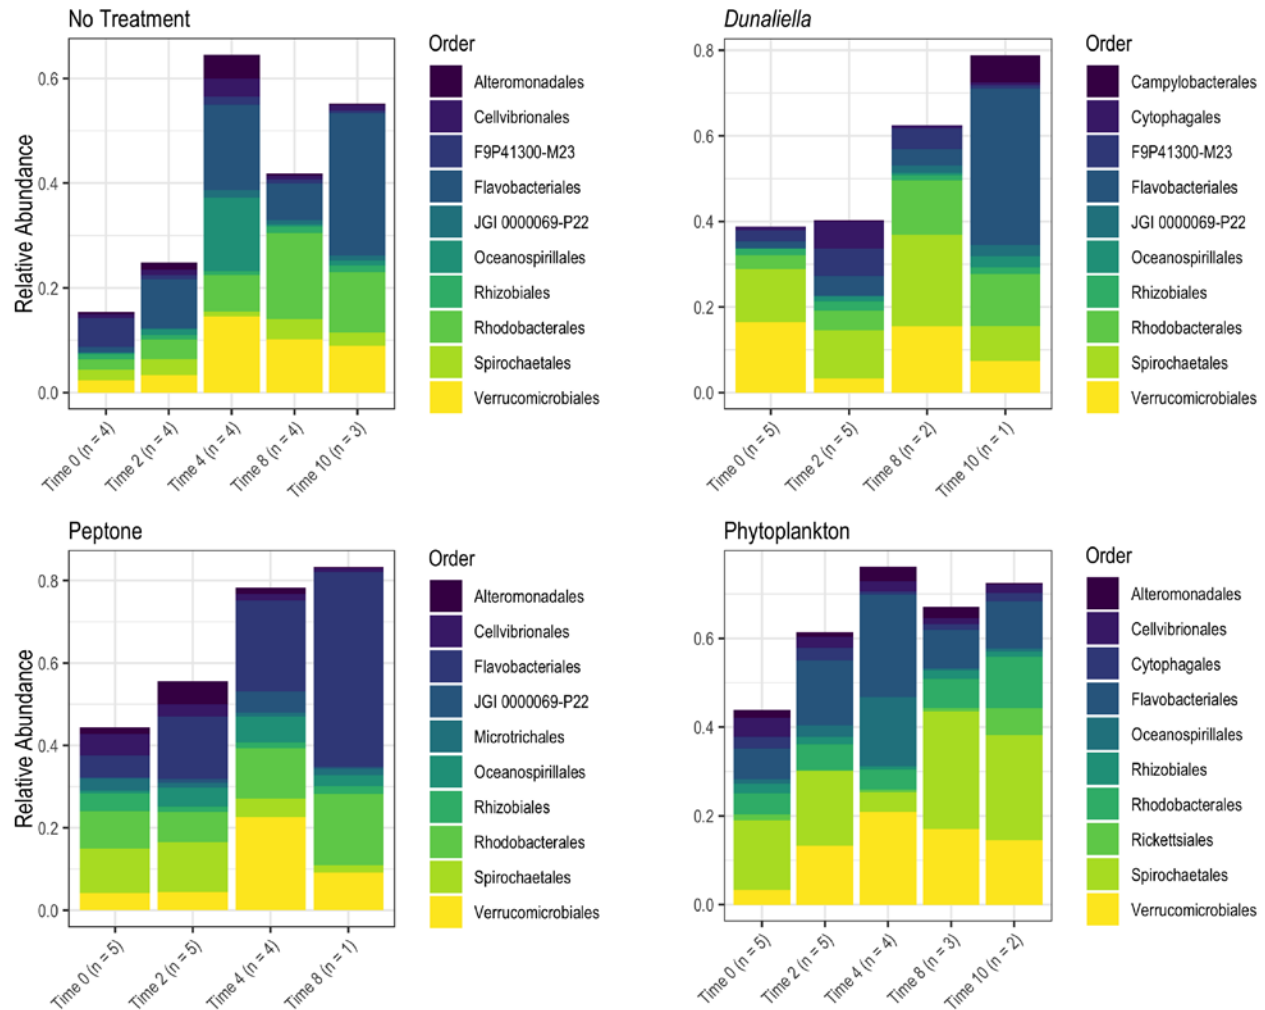

**Fig 5:** Relative abundance of bacterial orders derived from *P. ochraceus* epidermal swabs. Specimens were enriched with the indicated organic material and sampled until lesion genesis. Time 0 represents initial sampling and each subsequent time indicates the respective day. n values reflect the number of healthy specimens at each given timepoint.

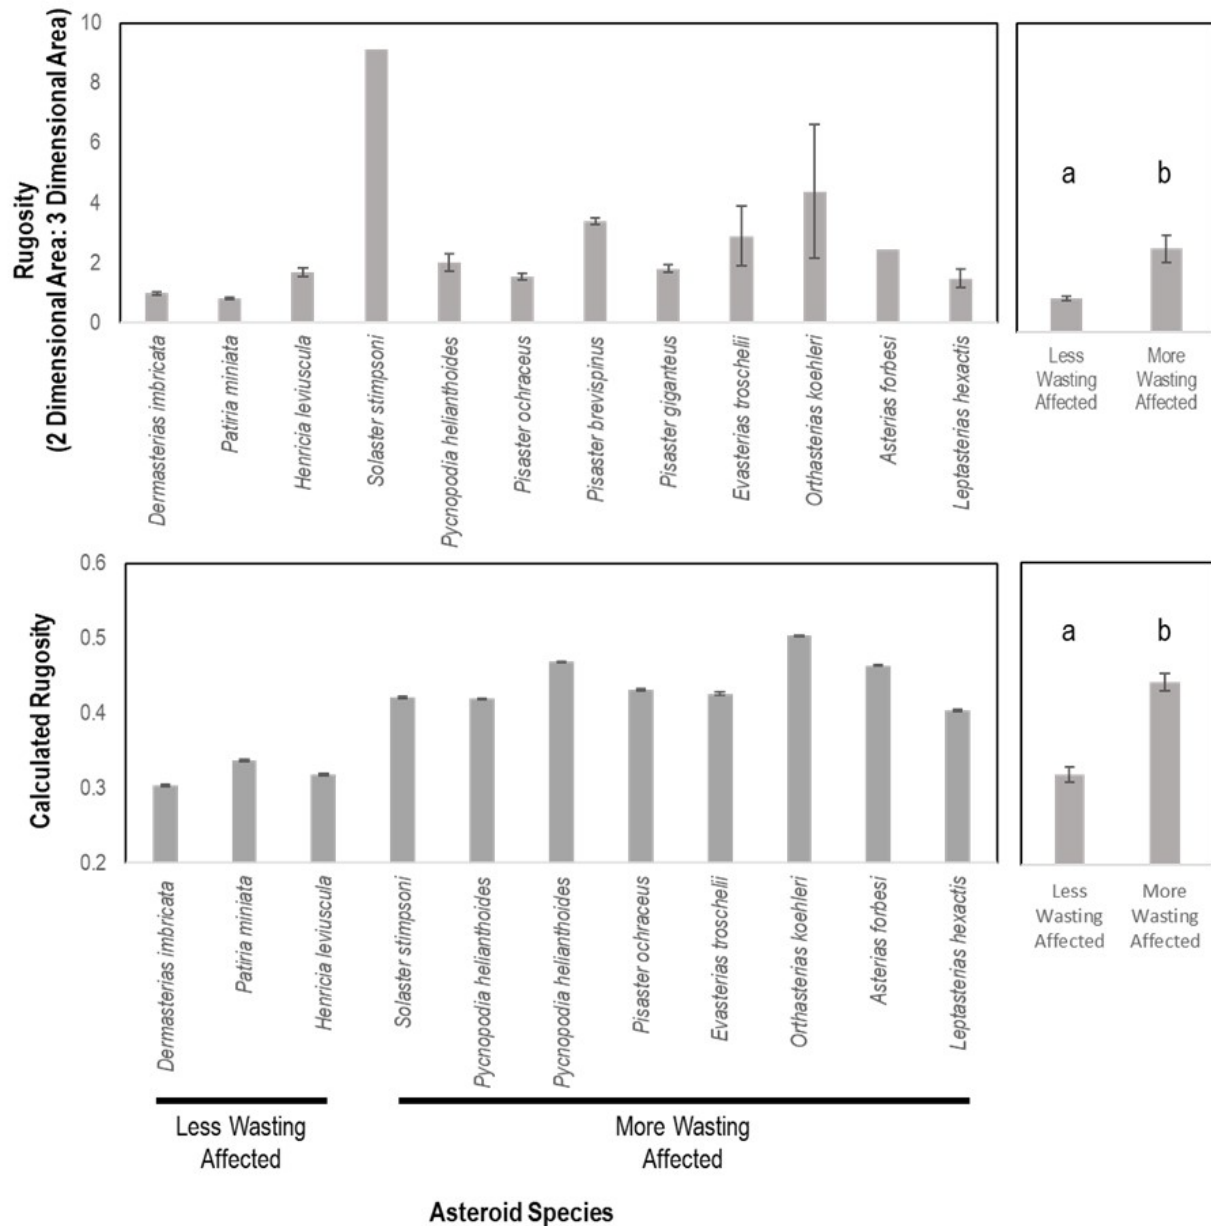

**Fig. 6:** Rugosity of similarly-sized animals between wasting-affected and less wasting affected species as determined by whole animal computed tomography (top) and of an asteroid ray by micro-computed tomography (bottom). a, b denote significant difference at  $p < 0.001$ .

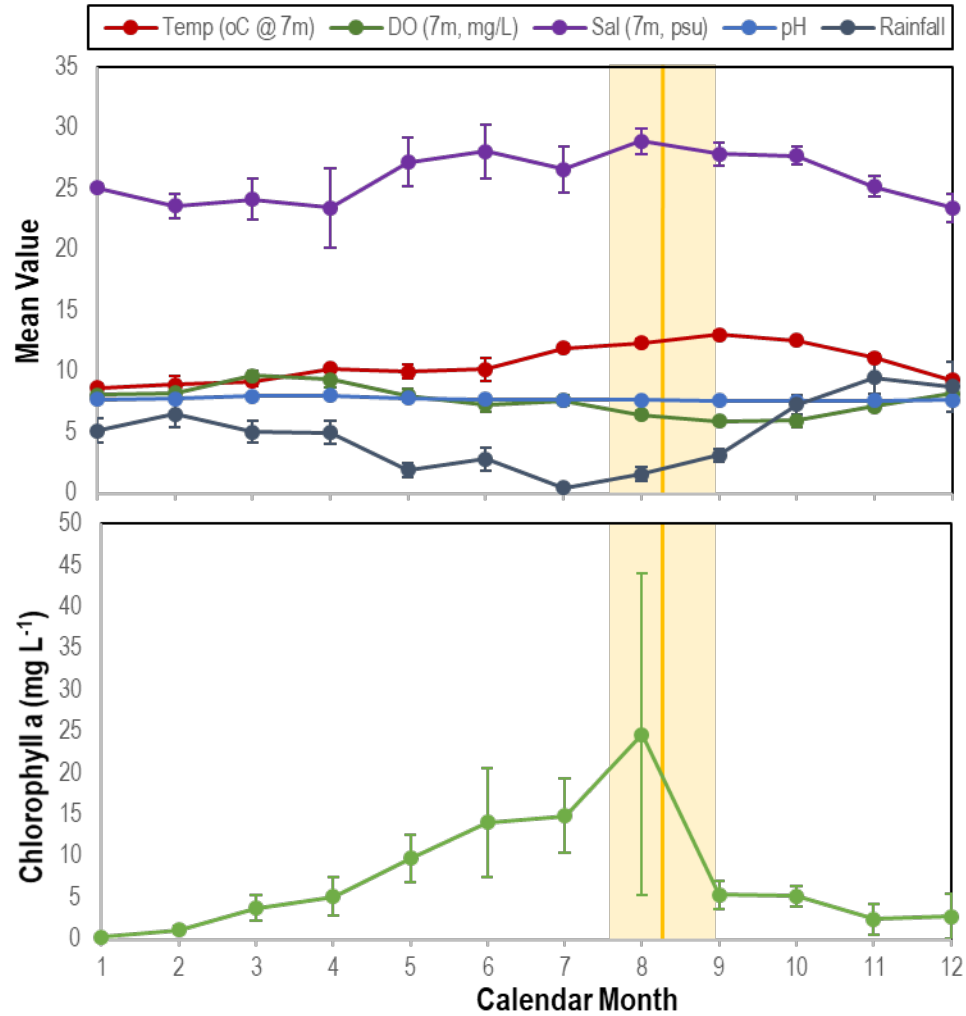

**Fig 7:** Correspondence between mean time of wasting mass mortality (indicated by solid orange line (SE range indicated by lighter orange bar) compared with physico-chemical parameters (top) and chlorophyll a concentration (bottom) at Penn Cove, Whidbey Island. Temp = temperature; DO = dissolved oxygen; Sal = salinity.

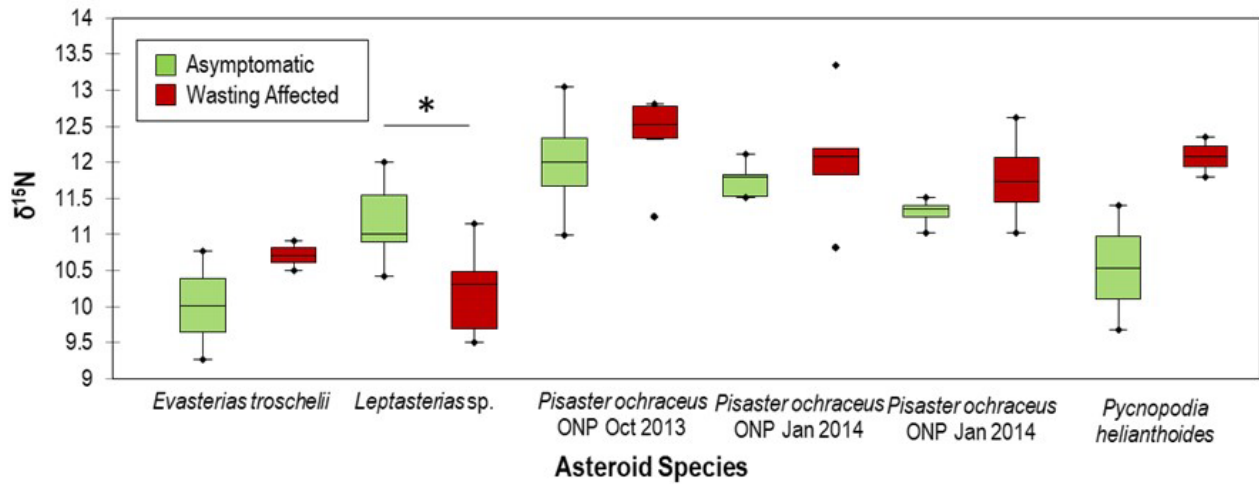

**Fig. 8:** Comparison of asymptomatic and wasting  $\delta^{15}\text{N}$  values between species. ONP = Starfish point, Olympic national park and SC = Davenport, Santa Cruz, CA.
